1 **Isolation and characterization of human monoclonal antibodies to**  
2 **pneumococcal capsular polysaccharide 3.**

3

4 Rachelle Babb <sup>a</sup>, Christopher R Doyle <sup>b</sup> & Liise-anne Pirofski <sup>a#</sup>.

5

6 <sup>a</sup> Division of Infectious Diseases, Department of Medicine, Albert Einstein College of Medicine  
7 & Montefiore Medical Center, Bronx, New York, USA.

8 <sup>b</sup> WCG IBC Services, Puyallup, Washington, USA.

9

10 Running Title: Pneumococcal human monoclonal antibodies

11

12

13 # Address correspondence to Liise-anne Pirofski, MD

14 Address: 1300 Morris Park Avenue, Bronx, NY, 10461

15 Phone: 718-430-2940, Fax: 718-430-8968

16 Email: [l.pirofski@einsteinmed.org](mailto:l.pirofski@einsteinmed.org)

17

18

19

20 Word count

21 Abstract: 223 words

22 Importance: 144 words

23 Text: 4444 words

24 **ABSTRACT:**

25 The current pneumococcal capsular polysaccharide (PPS) conjugate vaccine (PCV13) is less  
26 effective against *Streptococcus pneumoniae* serotype 3 (ST3), which remains a major cause of  
27 pneumococcal disease and mortality. Therefore, dissecting structure-function relationships of  
28 human PPS3 antibodies may reveal characteristics of protective antibodies. Using flow  
29 cytometry, we isolated PPS3-binding memory B cells from pneumococcal vaccine recipients and  
30 generated seven human PPS3-specific monoclonal antibodies (humAbs). Five humAbs displayed  
31 ST3 opsonophagocytic activity, four induced ST3 agglutination *in vitro*, and four mediated both  
32 activities. For two humAbs, C10 and C27, that used the same variable heavy ( $V_H$ ) and light ( $V_L$ )  
33 chain domains ( $V_H3-9*01/V_L2-14*03$ ), C10 had fewer  $V_L$  somatic mutations, higher PPS3  
34 affinity, more ST3 opsonophagocytic and agglutinating activity, whilst both humAbs altered ST3  
35 gene expression *in vitro*. After  $V_L$  swaps, C10 $V_H$ /C27 $V_L$  exhibited reduced ST3 binding and  
36 agglutination, but C27 $V_H$ /C10 $V_L$  binding was unchanged. In C57Bl/6 mice, C10 and C27  
37 reduced nasopharyngeal colonization with ST3 A66 and a clinical strain, B2, and prolonged  
38 survival following lethal A66 intraperitoneal infection, but only C10 protected against lethal  
39 intranasal infection with the clinical strain. Our findings, associate efficacy of PPS3-specific  
40 humAbs with ST3 agglutination and opsonophagocytic activity and reveal an unexpected role for  
41 the  $V_L$  in functional activity *in vitro* and *in vivo*. These findings also provide insights that may  
42 inform antibody-based therapy and identification of surrogates of vaccine efficacy against ST3.

43

44

45

46

47 **IMPORTANCE:**

48 Despite the global success of pneumococcal conjugate vaccination, serotype 3 (ST3)  
49 pneumococcus remains a leading cause of morbidity and mortality. In comparison to other  
50 vaccine-included serotypes, the ST3 pneumococcal capsular polysaccharide (PPS3) induces a  
51 weaker opsonophagocytic response, which is considered a correlate of vaccine efficacy. Previous  
52 studies of mouse PPS3 monoclonal antibodies identified ST3 agglutination as a correlate of  
53 reduced ST3 nasopharyngeal colonization in mice, however neither the agglutinating ability of  
54 human vaccine-elicited PPS3 antibodies nor their ability to prevent experimental murine  
55 nasopharyngeal colonization has been studied. We generated and analysed the functional and *in*  
56 *vivo* efficacy of human vaccine-elicited PPS3 monoclonal antibodies and found that ST3  
57 agglutination associated with antibody affinity, protection *in vivo*, and limited somatic mutations  
58 in the light chain variable region. These findings provide new insights that may inform the  
59 development of antibody-based therapies and next generation vaccines for ST3.

60

61

62

63

64

65

66

67

68 **INTRODUCTION:**

69 The current pneumococcal capsular polysaccharide conjugate vaccine, PCV13 is less effective  
70 against *S. pneumoniae* serotype 3 (ST3) than other vaccine-included serotypes (ST)'s. As a result,  
71 ST3 is a major cause of pneumonia and mortality in adults and children (1-5). Ample clinical  
72 data show that efficacy of pneumococcal conjugate vaccination reflects vaccine-mediated  
73 prevention of pneumococcal colonization and transmission, with vaccine-elicited ST-specific  
74 opsonophagocytic serum antibodies generally considered a surrogate for vaccine efficacy (6-8).  
75 However, a relationship between vaccine-elicited opsonophagocytic antibodies and protection  
76 against ST3 has not been established. In addition, compared to other vaccine-included STs, the  
77 capsular polysaccharide of ST3 (PPS3) is poorly immunogenic and induces a weaker  
78 opsonophagocytic antibody response (2). This reduced immunogenicity has been attributed to the  
79 thick ST3 capsule (9) as well as the limited ability of PPS3 antibodies to clear ST3 via  
80 opsonophagocytosis *in vivo* due to large amounts of ST3 capsule shedding (10). Nevertheless,  
81 opsonophagocytic PPS3 mouse and human monoclonal antibodies (mAbs) that are protective in  
82 ST3 sepsis and pneumonia models in mice have been generated (11-15). Notably, an  
83 opsonophagocytic mAb that protected against ST3 sepsis and pneumonia did not reduce ST3  
84 colonization, whereas a non-opsonic mAb that agglutinated ST3, reduced colonization, protected  
85 against sepsis and pneumonia and also altered ST3 gene expression *in vitro* and *in vivo* (11, 13,  
86 16).

87

88 Bacterial agglutination, including that of the pneumococcus, is a long-recognized correlate of  
89 PPS antibody efficacy in experimental models (17, 18). Whilst mouse and human PPS3 mAbs  
90 elicited by an experimental PPS3-TT conjugate revealed that ST3 opsonophagocytosis and

91 agglutination were mutually exclusive functions (11, 13, 16, 19), serum derived antibodies to  
92 ST4 and ST23 exhibited both opsonophagocytic and agglutinating functions (20). Consistent  
93 with the latter, among a set of 5 PPS3 mouse mAbs generated in response to a PPS3-KLH  
94 conjugate, 4 exhibited both opsonophagocytic and agglutinating activity and only one mediated  
95 opsonophagocytosis (21). These findings suggest that the nature of PPS3 antibodies that mediate  
96 opsonophagocytosis and agglutination versus those that mediate one function and not the other  
97 may differ.

98

99 Reduced efficacy of PPS3-specific antibodies against ST3 disease has been attributed to  
100 impaired opsonophagocytic clearance, and it has been estimated that approximately 8 times more  
101 antibody is required to confer protection against ST3 based on the calculated correlate of  
102 protection for other pneumococcal STs (2, 10). Thus, deciphering the structural and functional  
103 characteristics of human vaccine elicited PPS3 antibodies may advance understanding of vaccine  
104 failure and facilitate development of antibody-based therapies and next generation vaccines. To  
105 gain insight into the nature of human PPS3-binding antibodies, we generated PPS3 human mAbs  
106 (humAbs) from human pneumococcal vaccine recipients and determined their molecular  
107 derivation, PPS3 binding, and function *in vitro* and *in vivo*.

108

## 109 **RESULTS:**

### 110 **PPS3 humAbs use gene segments from the VH3 family.**

111 Seven PPS3-binding humAbs (PPS3 humAbs) were generated and tested for PPS3 binding by  
112 ELISA (Figure 1). C38 had the strongest binding to PPS3 ( $EC_{50}$ = 0.09  $\mu$ g/ml), followed by C34  
113 ( $EC_{50}$ = 0.21  $\mu$ g/ml), and C10 ( $EC_{50}$ = 0.24  $\mu$ g/ml). Binding to a ST3 clinical strain, B2 was also

114 similar by whole cell ELISA and immunofluorescence (Figure S1 & S2).  
115 Sequencing analysis revealed that five humAbs (C10, C12, C27, C34, C38) used lambda light  
116 chains (LC)s and two (C11, C18) used kappa LCs. Based on IgBlast, six used variable heavy 3  
117 ( $V_{H3}$ ) genes and one (C38) used a  $V_{H1}$  gene (Table 1). All seven humAbs had  $V_H$  and  $V_L$  CDR  
118 as well as FR somatic mutations (Figure S3 & S4). In addition, all seven humAb CDR3s  
119 differed by sequence and length, but four (C10, C27, C38, C11) had an Ala-Arg-Asp: ARD or  
120 Ala-Arg-Gly: ARG motif at the beginning of the  $V_H$  CDR3 region (Table 1). Two lambda  
121 humAbs, C10, C27 used the same heavy VDJ and LC VJ segments, but their FRs and CDRs  
122 differed by several somatic mutations (Figure 2). C10 and C27 had respectively, 9 and 8  $V_H$   
123 mutations conferring amino acid changes relative to germline IGHV3-9\*01, including 4 at the  
124 same positions and a shared Lysine (K) in CDR2. C10  $V_L$  was closer to germline IGVL2-14\*03,  
125 with fewer mutations (5 versus 11) than C27, 4 of which were shared.

126

### 127 **PPS3 humAbs agglutinate ST3 *in vitro*.**

128 It has been previously reported that antibodies that agglutinate pneumococcus can reduce  
129 pneumococcal colonization (13, 22, 23). Thus, we determined the ability of the PPS3 humAbs to  
130 agglutinate ST3 A66 and the clinical strain, B2 by flow cytometry and validated our findings  
131 with light microscopy. C10, C12, C34 and C38 each exhibited dose-dependent agglutination of  
132 ST3. At 10  $\mu\text{g/ml}$ , C34 and C38 agglutinated  $\sim 75\%$  and  $89\%$  of bacteria, respectively, whilst  
133 C10 and C12 agglutinated  $\sim 48\%$  and  $39\%$ , respectively (Figure 3A & B). Visual ST3 clumping  
134 was also observed with C10, C12, C34 and C38 by light microscopy (Figure 3C). Similar results  
135 regarding agglutination experiments were obtained with the clinical strain, B2 (Figure S5).  
136  $F(ab')_2$  fragments of C10 and C38 also agglutinated ST3 with levels comparable to their

137 respective whole IgG (Figure 4A & B).

138

### 139 **Opsonophagocytosis of ST3 by PPS3 humAbs.**

140 Functional activity of the humAbs was determined with the standard opsonophagocytic assay  
141 (OPA) used in the field (24, 25). C10 and C38 displayed the highest activity with significant  
142 reductions in CFU at 0.74  $\mu\text{g/ml}$  (Figure 5) relative to the IgG1 control. C12, C18 and C34  
143 reduced CFU at 2.2  $\mu\text{g/ml}$ , and C11 and C27 at 20  $\mu\text{g/ml}$ . When humAbs were incubated with  
144 ST3 without HL60 cells, C10, C18, C27, C34 and C38 reduced CFU relative to the control. This  
145 correlated with agglutination, except for C27.

146

### 147 **PPS3 humAbs reduce A66 and B2 nasopharyngeal colonization in C57Bl/6 mice.**

148 We next performed nasopharyngeal (NP) colonization experiments in mice with C10 and C27.  
149 These humAbs were used because they use the same  $V_{H3-9*01}/V_{L2-14*03}$  gene elements but  
150 have different affinities and functional activity *in vitro*. Compared to the IgG1 control,  
151 administration of C10 and C27 reduced NP CFU after infection with A66 (C10;  $P=0.0388$ , C27;  
152  $P=0.0437$ ) (Figure 6A) and B2 (C10;  $P=0.0128$ , C27;  $P=0.0015$ ) (Figure 6B). CFU were not  
153 detected in the lungs (data not shown). Compared to IgG1-treated controls, B2-infected C10- and  
154 C27-treated mice had significantly lower TNF- $\alpha$ , IL-1 $\alpha$  and IL-6 levels 4 days post infection  
155 (Figure 6C).

156

### 157 **PPS3 humAbs prolong survival of mice lethally infected with A66 and B2.**

158 The efficacy of C10, C27, and C38 was next investigated in lethal ST3 infection models. C38  
159 was included because it exhibited strong ST3 binding, opsonophagocytosis, and agglutination. IP

160 administration of all three mAbs prolonged survival after IP infection with A66 (Figure 7A). C10  
161 was the most protective (92% survival, P=0.0001), followed by C27 (76%, P=0.001), and C38  
162 (70%, P=0.0036). In a lethal IN infection model, IN administration of C10, but not C27  
163 prolonged survival after infection with B2 (85%, P=0.0291) compared to the IgG1 control  
164 (Figure 7B).

165

### 166 **HumAbs alter bacterial gene expression *in vitro*.**

167 Given that C27 did not promote agglutination or opsonophagocytosis *in vitro*, yet it reduced  
168 colonization and protected against lethal IP infection (sepsis), we sought an alternative  
169 mechanism by which it could mediate protection. Previous work showed that defined PPS3  
170 mAbs enhanced ST3 A66 transformation frequency and competence, and one mAb, 1E2, altered  
171 ST3 gene expression *in vitro* and *in vivo* (13, 16, 19). Thus, we performed RT-qPCR on reactions  
172 of ST3 A66 incubated with C10 and C27 to analyze expression of ST3 genes that induce or  
173 respond to oxidative stress (*dpr*, *piuB*, *blpX*, *merR*, *comX*) and of which expression was altered in  
174 1E2-treated mice following NP colonization (16). In comparison to an IgG1 control, C10 and  
175 C27 each induced a significant decrease in *dpr* gene expression (Figure 8). We also observed a  
176 decrease in *piuB*, *blpX*, *merR* and *comX* expression (Figure 8). There were no significant  
177 differences between C10 and C27 in the genes examined.

178

### 179 **Analysis of humAbs with V<sub>L</sub> swaps.**

180 Given that C10 and C27 use the same V<sub>H</sub> and V<sub>L</sub>, but C27 had lower affinity, reduced ST3  
181 binding and more mutations in its V<sub>L</sub> region relative to the germline, we performed V<sub>L</sub> swaps to  
182 evaluate the effect of V<sub>L</sub> on binding and agglutination. PPS3 and B2 binding of C10 expressing



183 the V<sub>L</sub> of C27 (C10<sub>H</sub>C27<sub>L</sub>) was reduced compared to that of native C10, whereas C27 exhibited  
184 no differences in binding when expressing the C10 V<sub>L</sub> (C27<sub>H</sub>C10<sub>L</sub>) (Figure 9A). In agglutination  
185 experiments with B2, 20 µg/ml of C10 promoted strong agglutination (~75%) compared to  
186 C10<sub>H</sub>C27<sub>L</sub> (~10%), but there were no differences in agglutination for C27<sub>H</sub>C10<sub>L</sub> relative to native  
187 C27 (Figure 9B & C).

188

## 189 **DISCUSSION:**

190 Here we report the gene use and *in vitro* functional activity of seven PPS3 humAbs generated  
191 from pneumococcal vaccine recipients. We also demonstrate the efficacy of two humAbs (C10 &  
192 C27) which use the same V<sub>H</sub> and V<sub>L</sub> genes (V<sub>H</sub>3-9\*01/V<sub>L</sub>2-14\*03) against NP colonization and  
193 lethal ST3 infection in mice. Our data show that the humAbs with the highest affinity, C10, C34,  
194 and C38, mediated the most ST3 agglutination and opsonophagocytic activity. Agglutinating  
195 PPS antibodies have been reported to enhance complement activation and complement-  
196 dependent killing *in vitro* and have also been shown to be important for reducing pneumococcal  
197 colonization in mice (20, 22, 23). Notably in our study, humAb ST3 agglutination occurred at  
198 low concentrations (≤20 µg/ml), whereas other reported PPS antibodies mediated agglutination  
199 of ST14 (100 µg/ml) (22) and ST23 (250 µg/ml) (23) at much higher concentrations. It is  
200 possible that humAb agglutination could have augmented CFU reductions in the OPA, as this  
201 was observed in the absence of HL60 cells. However, we do not know if this reflected ST3  
202 clumping or killing (26).

203

204 Consistent with prior work demonstrating V<sub>H</sub>3 restriction of PPS- and other polysaccharide-  
205 binding antibodies (27-30), each humAb except C38 used a V<sub>H</sub>3 gene element. PPS3-specific

206 residues important for PPS23F binding of a V<sub>H</sub>3-30 humAb (31) were not present in our humAbs.  
207 However, C10, C27, C38, C11, each had Ala-Arg-Asp: ARD or Ala-Arg-Gly: ARG V<sub>H</sub> CDR3  
208 motifs, which have been described in PPS-binding (32) and polyreactive antibodies from  
209 pneumococcal vaccine recipients (33). There were no common V<sub>L</sub> motifs, but the C18 V<sub>L</sub> CDR3  
210 was identical to a PPS8-binding kappa humAb that used the same V<sub>L</sub> gene (V<sub>L</sub> 2-30) (32).  
211 Serological cross reactivity has not been described for PPS3 and PPS8, but they are similar  
212 structurally (34).

213  
214 In depth analysis of C10 and C27 humAbs revealed that in contrast to C10, C27 had lower PPS3  
215 affinity, minimal agglutinating ability, did not mediate opsonophagocytosis and had more  
216 somatic mutations in its V<sub>L</sub> relative to the germline. Nonetheless, both C10 and C27 reduced NP  
217 colonization with ST3 A66 and the clinical ST3 strain, B2 (Table 2). Similarly, both humAbs  
218 prolonged survival after lethal A66 IP infection, suggesting that complement and neutrophils in  
219 the blood may have enhanced the ability of lower affinity C27 to mediate ST3 clearance, as  
220 described for polyclonal IgG (35). However, IN administration of C10, but not C27 was  
221 protective against lethal IN challenge with B2. Even though both humAbs reduced NP  
222 colonization and inflammatory cytokines in the NP colonization model with this strain, it appears  
223 that only C10 prevented dissemination. Notably, an agglutinating mouse mAb, 1E2, prevented  
224 dissemination to the lungs after NP colonization, whereas an opsonic mouse mAb, 7A9, did not  
225 (13). However, we do not know if the reduced efficacy of C27 in this model reflects an inability  
226 to prevent dissemination, and/or distinct features of the ST3 clinical strain, B2. Tissue specific  
227 differences in virulence have been identified for other STs (36, 37), but further work is needed to  
228 dissect the roles that humAbs and ST3 strain specific differences may play in the reduced

229 efficacy of C27 observed in the lethal IN infection model.

230

231 The main mechanism by which pneumococcal vaccine-elicited antibodies are thought to confer  
232 protection is by mediating ST-specific opsonophagocytosis and this function has been considered  
233 a surrogate for vaccine efficacy in clinical studies (6-8). While vaccine effectiveness studies  
234 support this association for most vaccine-included STs, this is not the case for ST3 (against  
235 which current vaccines are less effective compared to other STs) (2). Given that our data show  
236 that C10, which was highly agglutinating and opsonophagocytic, reduced colonization and  
237 protected against lethal ST3 infection, its efficacy could stem from its agglutinating ability.  
238 There is now ample evidence that ST-specific agglutination can reduce NP colonization in mice  
239 (13), but less evidence that opsonophagocytic antibodies reduce colonization. In fact, a PPS  
240 mouse mAb (7A9) protected against pneumonia and sepsis but did not reduce colonization in  
241 mice (11, 13). Thus, it is possible that ST-specific agglutination, which has not been examined as  
242 a correlate of pneumococcal vaccine efficacy in clinical studies, may be a better correlate of  
243 vaccine effectiveness against pneumococcal colonization and transmission than  
244 opsonophagocytosis. In support of this concept and previously highlighted, agglutinating PPS  
245 antibodies are important in prevention of pneumococcal colonization in mice (20, 22, 23). While  
246 this may help explain how C10 and C38 worked in our models, it does not explain the efficacy of  
247 C27.

248

249 Given that C27 did not exhibit agglutination or opsonophagocytosis *in vitro*, but reduced  
250 colonization and prevented death from IP infection *in vivo*, it may have mediated these functions  
251 *in vivo*. Nevertheless, its lower affinity seems to make this unlikely and we cannot explain its

252 activity based on known mechanisms of PPS antibody action. Thus, we explored the possibility  
253 that both C10 and C27 may exert direct effects on ST3 and alter its biological state, as described  
254 for a mouse PPS3 mAb that altered gene expression and affected ST3 survival (16, 19). Similarly,  
255 we observed a downregulation in *dpr*, which is normally expressed in response to intracellular  
256 iron and needed to sequester iron to protect bacteria from oxidative damage (38-40). However, in  
257 contrast to the previous *in vivo* study, our *in vitro* data show that C10 and C27 reduced  
258 expression of other ST3 genes including *blpX*, an immunity gene needed to avoid bacteriocin-  
259 mediated suicide and protect against other bacteriocins (41) and *piuB*, which is essential for  
260 regulating iron transport (42). Given their importance in the response to oxidative stress, it is  
261 possible that PPS3 antibody-mediated downregulation of these genes could affect ST3 survival.  
262 In fact, alteration of ST2 pneumococcal gene expression was reported with penicillin treatment,  
263 which similarly reduced expression of genes related to pneumococcal iron uptake (*Piu*) operon  
264 *piuBCDA* and competence (43). Experiments to assess the effect of these humAb-induced  
265 changes in ST3 gene expression *in vitro* on ST3 viability *in vivo* are beyond the scope of the  
266 current study.

267  
268 The affinity differences between C10 and C27 could be related to their distinct  $V_H$  and  $V_L$   
269 mutations. Notably, for clonally related PPS14 Fabs, the more extensively mutated  $V_H$  region  
270 had lower affinity (44). Similarly, more highly mutated mouse *Cryptococcus neoformans*  
271 capsular polysaccharide mAbs had lower affinity and less efficacy *in vivo* (45). Although C10  
272 and C27 have a comparable number of mostly distinct  $V_H$  mutations, the C10  $V_L$  (IGVL2-14\*-  
273 03) is closer to germline than C27. Given that the C10 LC swap (C10<sub>H</sub>C27<sub>L</sub>) had lower PPS3  
274 affinity and was less agglutinating than native C10, its superior binding and efficacy against B2

275 may depend on its  $V_L$  structure. Notably, structure-function studies of viral antibodies have  
276 revealed that  $V_L$  gene use and structure can dictate whether an antibody is neutralizing or non-  
277 neutralizing (46, 47). Our data show that the C10  $V_L$  plays a critical role in its agglutinating  
278 activity, which was lost when we substituted its  $V_L$  with the  $V_L$  of C27. On the other hand,  
279 substituting the C27  $V_L$  with that of C10 did not alter its agglutinating activity. Together, these  
280 findings highlight the potential importance of  $V_L$  structure and  $V_H/V_L$  pairing for PPS3  
281 agglutination, which may depend on a specific PPS3 epitope-humAb interaction. Understanding  
282 this interaction will require identification of humAb PPS3 epitopes and structural requirements  
283 for binding, as recently reported for a PPS3 mouse mAb  $V_H$  (21) however with a focus on the  $V_L$ .  
284

285 To our knowledge, this is the first in depth report of the binding and functional characteristics of  
286 pneumococcal vaccine elicited PPS3 humAbs. Our findings reveal an unexpected role for the  $V_L$   
287 in PPS3 binding and agglutination, and confirm prior reports demonstrating the ability of PPS3  
288 antibodies to affect ST3 gene expression *in vitro*, suggesting a possible mechanism by which  
289 non-opsonic and non-agglutinating antibody functions may translate into an ability of certain  
290 human PPS3 antibodies to reduce ST3 NP colonization. Although more extensive analyses are  
291 needed to understand the impact of PPS3-humAb structure-function relationships on antibody-  
292 mediated protection, our data suggest that such investigations will be needed to inform the  
293 development of therapeutic ST3 humAbs and more immunogenic ST3 vaccines, which remain  
294 urgently needed given the continued threat of ST3 infection globally (1-5).

295

296

297

298 **MATERIALS & METHODS:**

299 **Bacteria**

300 *S. pneumoniae* ST3 strain A66 (provided by David Briles; University of Alabama at Birmingham,  
301 AL) and a clinical ST3 strain, B2 (isolated in the Montefiore Medical Center (MMC) clinical  
302 microbiology laboratory under Albert Einstein College of Medicine IRB protocol 2014-4035)  
303 were grown as previously described (13).

304

305 **Mice**

306 6-8 week-old wildtype (WT) female C57BL/6 mice (NCI) were housed in the Albert Einstein  
307 College of Medicine Institute for Animal Studies (IAS). All animal studies were approved by the  
308 Institutional Animal Care and Use Committee at Albert Einstein College of Medicine (protocol  
309 #20171212).

310

311 **PBMC blood collection**

312 After obtaining informed consent under Einstein/Montefiore Institutional Review Board protocol  
313 2016-7376, PBMCs were isolated by density gradient centrifugation as described (48) from  
314 whole blood of healthy volunteers seven days after pneumococcal vaccination (Pneumovax or  
315 Prevnar13). PBMCs were stored in liquid nitrogen prior to use.

316

317 **PPS3-PE antigen optimization**

318 Concentrations of fluorescently conjugated PPS3 (PPS3-PE) (Fina BioSolutions) were incubated  
319 with ST3 mouse hybridoma cells (11) with or without unlabelled PPS3 (25 µg/well). PPS3-PE

320 positive cells were gated by flow cytometry with cells without PPS3-PE as negative controls.

321 The optimal concentration had similar background fluorescence to control cells (Figure S6).

322

### 323 **Sorting of PPS3-binding memory B cells by flow cytometry**

324 PBMCs were combined from 3 pneumococcal vaccine recipients (two Pneumovax and one

325 PCV13 recipient), to increase probability of isolating PPS3-specific memory B cells. PPS3-

326 memory B cells were defined as (CD19<sup>+</sup>CD27<sup>+</sup>IgM<sup>-</sup>IgG<sup>+</sup>PPS3<sup>+</sup>). PBMCs were stained with

327 PPS3-PE and anti-human fluorescently-conjugated: CD19-PE-Cy7, CD27-APC, IgM-FITC,

328 IgG-V421, CD3-V500, CD4-V500, CD8-V500 and CD14-V500 (BD). Live/dead (LD) cells

329 were identified with Zombie aqua fixable viability kit (Biolegend). CD3, CD4, CD8 and CD14

330 positive cells were excluded. Gating strategy shown in Figure S7. Single cells were sorted on a

331 BD FACSAria II into 96-well PCR plates (MicroAmp Endura Optical 96-Well Clear Reaction

332 Plates, Life technologies) into lysis buffer as described (49).

333

### 334 **HumAb generation**

335 Variable heavy ( $V_H$ ) and light ( $V_L$ ) chain immunoglobulin genes from sorted B cells were PCR

336 amplified, sequenced, cloned, and produced as human IgG1s in HEK-293 cells as described (49,

337 50). For cloning and ligation into human IgG1 expression vectors (IgG-AbVec (PBR322 based),

338 Ig $\kappa$ -AbVec (PBR322 based) and Ig $\lambda$ -AbVec (PBR322 based) (obtained from (50)), refined

339 primers listed in (51) were used to generate DNA fragments with overlapping ends. Gibson

340 assembly was performed to ligate DNA fragments with their corresponding digested vectors

341 using the NEBuilder® HiFi DNA Assembly Master Mix (NEB) according to the manufacturer's

342 guidelines. Sequencing of  $V_H$  and  $V_L$  regions was performed by GENEWIZ (New Jersey, NY).

343 HumAbs were purified using the Gentle Ag/Ab binding and Elution Buffer kit (Thermo  
344 Scientific). HumAbs were concentrated using Millipore amicon ultra centrifugal filter tubes (30K  
345 MWCO) and resuspended in 200mM NaCl and 20mM Hepes pH 7.4.

346

#### 347 **ELISA to determine binding profiles**

348 PPS3 ELISAs were performed using 96-well Nunc Maxisorp plates (ThermoFisher Scientific)  
349 coated with purified PPS3 (ATCC) (10 µg/ml) in PBS overnight at 4°C as described (11, 52).  
350 Pneumococcal polysaccharide 8 (PPS8) (ATCC) (10 µg/ml) was used as a negative control. The  
351 numerical half-maximal binding titer (EC<sub>50</sub>) was determined by graphpad prism. A whole-cell  
352 ELISA (53) was used to determining binding to the clinical strain B2, similar for PPS3.

353

#### 354 **Generation of F(ab')<sub>2</sub> fragments**

355 F(ab')<sub>2</sub> fragments were generated using IdeZ protease (NEB), purified using CaptureSelect LC-  
356 lambda affinity matrix (human) (ThermoFisher), and concentrated with amicon ultra centrifugal  
357 filter tubes (30K MWCO) according to manufacturers' instructions. Digestion and purification  
358 were confirmed by SDS-PAGE using mini-PROTEAN TGX pre-cast gels (4-20%) (BioRad).

359

#### 360 ***In vitro* agglutination of ST3 bacteria**

361 HumAb agglutination of ST3 was determined by flow cytometry as described (23, 54). ST3  
362 strains A66 or B2 (1x 10<sup>5</sup> CFU) were incubated with humAbs, F(ab')<sub>2</sub> fragments or human IgG1  
363 (control) (Southern Biotech) for 1hr at 37°C in a 96-well plate. Cells were fixed with 1%  
364 paraformaldehyde and analysed by flow cytometry. Bacteria were gated on forward (FSC) and  
365 sideward (SSC) scatter (referring to cell size and granularity) to determine percentage



366 agglutination. Agglutination was also assessed by light microscopy. Aliquots from each sample  
367 were spotted onto 1% agarose pads and visualized with an AxioImager Z1 microscope (Zeiss).

368

### 369 **Immunofluorescence**

370 HumAbs (20 µg/ml) were mixed with  $1 \times 10^6$  bacteria (50ul) in microcentrifuge tubes and  
371 incubated for 1hr at 37°C. Bacteria were washed 1x with PBS by centrifugation and anti-human  
372 IgG-FITC was added to each sample and incubated for 1hr at 37°C. After washing, aliquots  
373 were spotted onto 1% agarose pads and visualized with an AxioImager Z1 microscope (Zeiss)  
374 (100X magnification).

375

### 376 **Opsonophagocytosis assay (OPA)**

377 The assay was performed with differentiated HL-60 cells at an effector/target cell ratio of 400:1  
378 as described (11, 24). HumAbs and IgG1 (control) (Southern Biotech) were diluted 3-fold from  
379 20 µg/ml. ST3 (A66) killing (%) was determined in the presence of humAbs under 2 conditions:  
380 with HL60 cells and complement (3-4 week rabbit complement, Pel-Freez) or without HL60  
381 cells (humAbs and bacteria only), by plating aliquots of samples onto blood agar plates and  
382 enumerating CFU.

383

### 384 ***In vitro* bacterial gene expression by reverse transcription-quantitative PCR (RT-qPCR).**

385 To analyse the expression of selected genes during *in vitro* growth as previously described (16),  
386 in brief bacteria were grown as described above, diluted to a starting OD of ~0.01 and 1 ml of  
387 culture was incubated with humAbs (C10, C27) or IgG1 control at a concentration of 10 µg/ml  
388 for 1.5 hours at 37°C. Bacterial RNA was extracted using the TRIzol Max Bacterial RNA  
389 isolation kit (Life technologies) using the manufacturers protocol. RNA was then Dnase treated

390 using the TURBO DNA free kit (Invitrogen) and cDNA was synthesized from 200 ng RNA  
391 using the iScript cDNA synthesis kit (BioRad). qPCR was performed using Power SYBR green  
392 master mix (Life Technologies) with 10 ng cDNA and 10  $\mu$ m primers outlined in Table S1 as per  
393 manufacturers instructions. Amplification was performed on a StepOne Plus real-time PCR  
394 system (Life Technologies) using the following conditions: 95°C for 10 mins, followed by 40  
395 cycles of 95°C for 15 seconds and 60°C for 1 min. Relative expression of genes in humAb  
396 treated bacteria was calculated using the threshold cycle ( $2^{-\Delta\Delta C_t}$ ) method as described  
397 previously (55) using the 16S rRNA gene as an internal control and control IgG1-treated bacteria  
398 as the reference.

399

#### 400 **Mouse infection experiments**

401 Colonization model: Mice were anesthetized with isoflurane and injected intranasally (IN) with  
402 25  $\mu$ g of humAbs or anti-human IgG1 (Bxcell) (isotype control) diluted in PBS as described (13).  
403 2hrs after humAb administration, mice were infected IN with either  $5 \times 10^5$  CFU of A66 or  $1 \times 10^7$   
404 CFU of B2 in 10ul. CFU were enumerated in the nasal lavage (NL) and lungs at the times  
405 specified (24 hrs or 4 days) after infection as described (13). NL cytokines were determined after  
406 concentration using the Legendplex Mouse inflammation panel (13-plex) (Biolegend) as per  
407 manufacturer's protocol.

408 Lethal infection model: Mice were injected either IP or IN with 25  $\mu$ g humAb or anti-human  
409 IgG1 in PBS as described above. 2hr after humAb administration, mice were infected IP with  
410  $5 \times 10^5$  CFU A66 (100ul) or IN with  $5 \times 10^7$  CFU B2 in 10ul and monitored for survival.

411

#### 412 **Nucleotide sequence accession numbers**

413 GenBank accession numbers were as follows: C10V<sub>H</sub>, MZ054262, C11V<sub>H</sub>, MZ054263, C12V<sub>H</sub>,  
414 MZ054264, C18V<sub>H</sub>, MZ054265, C27V<sub>H</sub>, MZ054266, C34V<sub>H</sub>, MZ054267, C38V<sub>H</sub>, MZ054268;

415 C10V<sub>L</sub>, MZ054269, C11V<sub>L</sub>, MZ054270, C12V<sub>L</sub>, MZ054271, C18V<sub>L</sub>, MZ054272, C27V<sub>L</sub>,  
416 MZ054273, C34V<sub>L</sub>, MZ054274 and C38V<sub>L</sub> MZ054275.

417

#### 418 **Statistical analysis**

419 Data were analysed using a Fisher's exact test (Survival) or a one-way ANOVA for other  
420 analyses as indicated in the figure legends using GraphPad prism. *P*-values  $\leq 0.05$  were  
421 considered significant.

422

#### 423 **ACKNOWLEDGMENTS:**

424 We thank Phil Gialanella at Montefiore Medical Center for isolation of the clinical strain B2  
425 used in the study. This study was supported by the National Institutes of Health grants to LP:  
426 R01AG045044 and R01AI123654.

427

#### 428 **AUTHOR CONTRIBUTIONS:**

429 RB designed, performed experiments, analysed, interpreted data and wrote the manuscript. CD  
430 assisted with experimental design, contributed to revising and critically reviewing the  
431 manuscript. LP supervised the study, designed experiments, interpreted data and wrote the  
432 manuscript.

433

#### 434 **DISCLOSURE:**

435 No author has a conflict of interest with the data reported in this article.

## REFERENCES:

- 436 1. Goettler D, Streng A, Kemmling D, Schoen C, von Kries R, Rose MA, van der Linden M,  
437 Liese JG. 2020. Increase in *Streptococcus pneumoniae* serotype 3 associated  
438 parapneumonic pleural effusion/empyema after the introduction of PCV13 in Germany.  
439 *Vaccine* 38:570-577.
- 440 2. Andrews NJ, Waight PA, Burbidge P, Pearce E, Roalfe L, Zancolli M, Slack M, Ladhani  
441 SN, Miller E, Goldblatt D. 2014. Serotype-specific effectiveness and correlates of  
442 protection for the 13-valent pneumococcal conjugate vaccine: a postlicensure indirect  
443 cohort study. *Lancet Infect Dis* 14:839-46.
- 444 3. Grabenstein JD, Musey LK. 2014. Differences in serious clinical outcomes of infection  
445 caused by specific pneumococcal serotypes among adults. *Vaccine* 32:2399-405.
- 446 4. Wijayasri S, Hillier K, Lim GH, Harris TM, Wilson SE, Deeks SL. 2019. The shifting  
447 epidemiology and serotype distribution of invasive pneumococcal disease in Ontario,  
448 Canada, 2007-2017. *PLoS One* 14:e0226353.
- 449 5. Groves N, Sheppard CL, Litt D, Rose S, Silva A, Njoku N, Rodrigues S, Amin-  
450 Chowdhury Z, Andrews N, Ladhani S, Fry NK. 2019. Evolution of *Streptococcus*  
451 *pneumoniae* Serotype 3 in England and Wales: A Major Vaccine Evader. *Genes (Basel)*  
452 10.
- 453 6. Romero-Steiner S, Frasch CE, Carlone G, Fleck RA, Goldblatt D, Nahm MH. 2006. Use  
454 of opsonophagocytosis for serological evaluation of pneumococcal vaccines. *Clin*  
455 *Vaccine Immunol* 13:165-9.

- 456 7. Henckaerts I, Durant N, De Grave D, Schuerman L, Poolman J. 2007. Validation of a  
457 routine opsonophagocytosis assay to predict invasive pneumococcal disease efficacy of  
458 conjugate vaccine in children. *Vaccine* 25:2518-27.
- 459 8. Schuerman L, Wysocki J, Tejedor JC, Knuf M, Kim KH, Poolman J. 2011. Prediction of  
460 pneumococcal conjugate vaccine effectiveness against invasive pneumococcal disease  
461 using opsonophagocytic activity and antibody concentrations determined by enzyme-  
462 linked immunosorbent assay with 22F adsorption. *Clin Vaccine Immunol* 18:2161-7.
- 463 9. Hammerschmidt S, Wolff S, Hocke A, Rosseau S, Muller E, Rohde M. 2005. Illustration  
464 of pneumococcal polysaccharide capsule during adherence and invasion of epithelial cells.  
465 *Infect Immun* 73:4653-67.
- 466 10. Choi EH, Zhang F, Lu YJ, Malley R. 2016. Capsular Polysaccharide (CPS) Release by  
467 Serotype 3 Pneumococcal Strains Reduces the Protective Effect of Anti-Type 3 CPS  
468 Antibodies. *Clin Vaccine Immunol* 23:162-7.
- 469 11. Tian H, Weber S, Thorkildson P, Kozel TR, Pirofski LA. 2009. Efficacy of opsonic and  
470 nonopsonic serotype 3 pneumococcal capsular polysaccharide-specific monoclonal  
471 antibodies against intranasal challenge with *Streptococcus pneumoniae* in mice. *Infect*  
472 *Immun* 77:1502-13.
- 473 12. Weber S, Tian H, van Rooijen N, Pirofski LA. 2012. A serotype 3 pneumococcal  
474 capsular polysaccharide-specific monoclonal antibody requires Fcγ receptor III and  
475 macrophages to mediate protection against pneumococcal pneumonia in mice. *Infect*  
476 *Immun* 80:1314-22.
- 477 13. Doyle CR, Pirofski LA. 2016. Reduction of *Streptococcus pneumoniae* Colonization and  
478 Dissemination by a Nonopsonic Capsular Polysaccharide Antibody. *MBio* 7:e02260-15.

- 479 14. Russell ND, Corvalan JR, Gallo ML, Davis CG, Pirofski L. 2000. Production of  
480 protective human antipneumococcal antibodies by transgenic mice with human  
481 immunoglobulin loci. *Infect Immun* 68:1820-6.
- 482 15. Chang Q, Zhong Z, Lees A, Pekna M, Pirofski L. 2002. Structure-function relationships  
483 for human antibodies to pneumococcal capsular polysaccharide from transgenic mice  
484 with human immunoglobulin Loci. *Infect Immun* 70:4977-86.
- 485 16. Doyle CR, Moon JY, Daily JP, Wang T, Pirofski LA. 2018. A Capsular Polysaccharide-  
486 Specific Antibody Alters *Streptococcus pneumoniae* Gene Expression during  
487 Nasopharyngeal Colonization of Mice. *Infect Immun* 86.
- 488 17. Bull CG. 1915. The Mechanism of the Curative Action of Antipneumococcus Serum. *J*  
489 *Exp Med* 22:457-64.
- 490 18. Bull CG. 1915. The Agglutination of Bacteria in Vivo. *J Exp Med* 22:484-91.
- 491 19. Yano M, Gohil S, Coleman JR, Manix C, Pirofski LA. 2011. Antibodies to *Streptococcus*  
492 *pneumoniae* capsular polysaccharide enhance pneumococcal quorum sensing. *mBio* 2.
- 493 20. Dalia AB, Weiser JN. 2011. Minimization of bacterial size allows for complement  
494 evasion and is overcome by the agglutinating effect of antibody. *Cell Host Microbe*  
495 10:486-96.
- 496 21. Ozdilek A, Huang J, Babb R, Paschall AV, Middleton DR, Duke JA, Pirofski LA, Mousa  
497 JJ, Avci FY. 2021. A Structural Model for the Ligand Binding of Pneumococcal Serotype  
498 3 Capsular Polysaccharide-Specific Protective Antibodies. *mBio* 12:e0080021.
- 499 22. Roche AM, Richard AL, Rahkola JT, Janoff EN, Weiser JN. 2015. Antibody blocks  
500 acquisition of bacterial colonization through agglutination. *Mucosal Immunol* 8:176-85.

- 501 23. Mitsi E, Roche AM, Reine J, Zangari T, Owugha JT, Pennington SH, Gritzfeld JF,  
502 Wright AD, Collins AM, van Selm S, de Jonge MI, Gordon SB, Weiser JN, Ferreira DM.  
503 2016. Agglutination by anti-capsular polysaccharide antibody is associated with  
504 protection against experimental human pneumococcal carriage. *Mucosal Immunol*  
505 doi:10.1038/mi.2016.71.
- 506 24. Romero-Steiner S, Libutti D, Pais LB, Dykes J, Anderson P, Whitin JC, Keyserling HL,  
507 Carlone GM. 1997. Standardization of an opsonophagocytic assay for the measurement  
508 of functional antibody activity against *Streptococcus pneumoniae* using differentiated  
509 HL-60 cells. *Clin Diagn Lab Immunol* 4:415-22.
- 510 25. Song JY, Moseley MA, Burton RL, Nahm MH. 2013. Pneumococcal vaccine and  
511 opsonic pneumococcal antibody. *J Infect Chemother* 19:412-25.
- 512 26. Fabrizio K, Manix C, Guimaraes AJ, Nosanchuk JD, Pirofski LA. 2010. Aggregation of  
513 *Streptococcus pneumoniae* by a pneumococcal capsular polysaccharide-specific human  
514 monoclonal IgM correlates with antibody efficacy in vivo. *Clin Vaccine Immunol*  
515 17:713-21.
- 516 27. Maitta RW, Datta K, Lees A, Belouski SS, Pirofski LA. 2004. Immunogenicity and  
517 efficacy of *Cryptococcus neoformans* capsular polysaccharide glucuronoxylomannan  
518 peptide mimotope-protein conjugates in human immunoglobulin transgenic mice. *Infect*  
519 *Immun* 72:196-208.
- 520 28. Sun Y, Park MK, Kim J, Diamond B, Solomon A, Nahm MH. 1999. Repertoire of human  
521 antibodies against the polysaccharide capsule of *Streptococcus pneumoniae* serotype 6B.  
522 *Infect Immun* 67:1172-9.

- 523 29. Kolibab K, Smithson SL, Rabquer B, Khuder S, Westerink MA. 2005. Immune response  
524 to pneumococcal polysaccharides 4 and 14 in elderly and young adults: analysis of the  
525 variable heavy chain repertoire. *Infect Immun* 73:7465-76.
- 526 30. Zhou J, Lottenbach KR, Barenkamp SJ, Reason DC. 2004. Somatic hypermutation and  
527 diverse immunoglobulin gene usage in the human antibody response to the capsular  
528 polysaccharide of *Streptococcus pneumoniae* Type 6B. *Infect Immun* 72:3505-14.
- 529 31. Bryson S, Thomson CA, Risnes LF, Dasgupta S, Smith K, Schrader JW, Pai EF. 2016.  
530 Structures of Preferred Human IgV Genes-Based Protective Antibodies Identify How  
531 Conserved Residues Contact Diverse Antigens and Assign Source of Specificity to CDR3  
532 Loop Variation. *J Immunol* 196:4723-30.
- 533 32. Smith K, Muther JJ, Duke AL, McKee E, Zheng NY, Wilson PC, James JA. 2013. Fully  
534 human monoclonal antibodies from antibody secreting cells after vaccination with  
535 Pneumovax(R)23 are serotype specific and facilitate opsonophagocytosis.  
536 *Immunobiology* 218:745-54.
- 537 33. Thompson R, Khaskhely, N. , Malhotra, K. , Leggat, D. , Mosakowski, J. , Khuder, S. ,  
538 McLean, G. and Westerink, M. . 2012. Isolation and characterization of human  
539 polyreactive pneumococcal polysaccharide antibodies. *Open Journal of Immunology*  
540 2:98-110.
- 541 34. Schumann B, Hahm HS, Parameswarappa SG, Reppe K, Wahlbrink A, Govindan S,  
542 Kaplonek P, Pirofski LA, Witzernath M, Anish C, Pereira CL, Seeberger PH. 2017. A  
543 semisynthetic *Streptococcus pneumoniae* serotype 8 glycoconjugate vaccine. *Sci Transl*  
544 *Med* 9.



- 545 35. Reed WP, Stromquist DL, Williams RC, Jr. 1983. Agglutination and phagocytosis of  
546 pneumococci by immunoglobulin G antibodies of restricted heterogeneity. *J Lab Clin*  
547 *Med* 101:847-56.
- 548 36. Orihuela CJ, Gao G, McGee M, Yu J, Francis KP, Tuomanen E. 2003. Organ-specific  
549 models of *Streptococcus pneumoniae* disease. *Scand J Infect Dis* 35:647-52.
- 550 37. Minhas V, Aprianto R, McAllister LJ, Wang H, David SC, McLean KT, Comerford I,  
551 McColl SR, Paton JC, Veening JW, Trappetti C. 2020. In vivo dual RNA-seq reveals that  
552 neutrophil recruitment underlies differential tissue tropism of *Streptococcus pneumoniae*.  
553 *Commun Biol* 3:293.
- 554 38. Hua CZ, Howard A, Malley R, Lu YJ. 2014. Effect of nonheme iron-containing ferritin  
555 Dpr in the stress response and virulence of pneumococci. *Infect Immun* 82:3939-47.
- 556 39. Yamamoto Y, Poole LB, Hantgan RR, Kamio Y. 2002. An iron-binding protein, Dpr,  
557 from *Streptococcus mutans* prevents iron-dependent hydroxyl radical formation in vitro. *J*  
558 *Bacteriol* 184:2931-9.
- 559 40. Tsou CC, Chiang-Ni C, Lin YS, Chuang WJ, Lin MT, Liu CC, Wu JJ. 2008. An iron-  
560 binding protein, Dpr, decreases hydrogen peroxide stress and protects *Streptococcus*  
561 *pyogenes* against multiple stresses. *Infect Immun* 76:4038-45.
- 562 41. Bogaardt C, van Tonder AJ, Brueggemann AB. 2015. Genomic analyses of pneumococci  
563 reveal a wide diversity of bacteriocins - including pneumocyclicin, a novel circular  
564 bacteriocin. *BMC Genomics* 16:554.
- 565 42. Brown JS, Gilliland SM, Ruiz-Albert J, Holden DW. 2002. Characterization of pit, a  
566 *Streptococcus pneumoniae* iron uptake ABC transporter. *Infect Immun* 70:4389-98.

- 567 43. Rogers PD, Liu TT, Barker KS, Hilliard GM, English BK, Thornton J, Swiatlo E,  
568 McDaniel LS. 2007. Gene expression profiling of the response of *Streptococcus*  
569 *pneumoniae* to penicillin. *J Antimicrob Chemother* 59:616-26.
- 570 44. Lucas AH, Moulton KD, Tang VR, Reason DC. 2001. Combinatorial library cloning of  
571 human antibodies to *Streptococcus pneumoniae* capsular polysaccharides: variable region  
572 primary structures and evidence for somatic mutation of Fab fragments specific for  
573 capsular serotypes 6B, 14, and 23F. *Infect Immun* 69:853-64.
- 574 45. Mukherjee J, Nussbaum G, Scharff MD, Casadevall A. 1995. Protective and  
575 nonprotective monoclonal antibodies to *Cryptococcus neoformans* originating from one  
576 B cell. *J Exp Med* 181:405-9.
- 577 46. Ren J, Nettleship JE, Harris G, Mwangi W, Rhaman N, Grant C, Kotecha A, Fry E,  
578 Charleston B, Stuart DI, Hammond J, Owens RJ. 2019. The role of the light chain in the  
579 structure and binding activity of two cattle antibodies that neutralize bovine respiratory  
580 syncytial virus. *Mol Immunol* 112:123-130.
- 581 47. Tzarum N, Giang E, Kadam RU, Chen F, Nagy K, Augestad EH, Velazquez-Moctezuma  
582 R, Keck ZY, Hua Y, Stanfield RL, Dreux M, Prentoe J, Fong SKH, Bukh J, Wilson IA,  
583 Law M. 2020. An alternate conformation of HCV E2 neutralizing face as an additional  
584 vaccine target. *Sci Adv* 6:eabb5642.
- 585 48. Zhong Z, Pirofski LA. 1996. Opsonization of *Cryptococcus neoformans* by human  
586 anticryptococcal glucuronoxylomannan antibodies. *Infect Immun* 64:3446-50.
- 587 49. Tiller T, Meffre E, Yurasov S, Tsuiji M, Nussenzweig MC, Wardemann H. 2008.  
588 Efficient generation of monoclonal antibodies from single human B cells by single cell  
589 RT-PCR and expression vector cloning. *J Immunol Methods* 329:112-24.

- 590 50. Smith K, Garman L, Wrammert J, Zheng NY, Capra JD, Ahmed R, Wilson PC. 2009.  
591 Rapid generation of fully human monoclonal antibodies specific to a vaccinating antigen.  
592 Nat Protoc 4:372-84.
- 593 51. Ho IY, Bunker JJ, Erickson SA, Neu KE, Huang M, Cortese M, Pulendran B, Wilson PC.  
594 2016. Refined protocol for generating monoclonal antibodies from single human and  
595 murine B cells. J Immunol Methods 438:67-70.
- 596 52. Tian H, Groner A, Boes M, Pirofski LA. 2007. Pneumococcal capsular polysaccharide  
597 vaccine-mediated protection against serotype 3 *Streptococcus pneumoniae* in  
598 immunodeficient mice. Infect Immun 75:1643-50.
- 599 53. Hyams C, Camberlein E, Cohen JM, Bax K, Brown JS. 2010. The *Streptococcus*  
600 *pneumoniae* capsule inhibits complement activity and neutrophil phagocytosis by  
601 multiple mechanisms. Infect Immun 78:704-15.
- 602 54. Habets MN, van Selm S, van der Gaast-de Jongh CE, Diavatopoulos DA, de Jonge MI.  
603 2017. A novel flow cytometry-based assay for the quantification of antibody-dependent  
604 pneumococcal agglutination. PLoS One 12:e0170884.
- 605 55. Pfaffl MW. 2004. Quantification strategies in real-time PCR. AZ of quantitative PCR  
606 1:89-113.

## FIGURE LEGENDS:

607 **Figure 1: HumAb binding to pneumococcal polysaccharide 3 (PPS3) by ELISA.** Binding as  
608 reflected by absorbance at 405 is shown on the Y axis for the humAb concentrations shown on  
609 the X axis for each humAb. Results are representative of 3 independent experiments (n = 2). The  
610 numerical half-maximal binding titer (EC<sub>50</sub>) for each humAb is indicated to the right of the panel  
611 depicting binding curves of all humAbs.

612

613 **Figure 2: C10 and C27 variable heavy (V<sub>H</sub>) and light (V<sub>L</sub>) chain amino acid sequences.**

614 HumAb A) V<sub>H</sub> and B) V<sub>L</sub> sequences aligned with their germline counterparts based on IMGT/V-  
615 QUEST (sequence alignment software). Amino acid changes resulting from somatic mutations  
616 are indicated within the sequence alignment.

617

618 **Figure 3: HumAb agglutination of ST3 A66.**

619 The ability of the humAbs to agglutinate ST3 (A66) was assessed by flow cytometry. A)  
620 Representative FACS dot plots showing the percentage agglutination of all humAbs and control  
621 human IgG1 at various concentrations by flow cytometry B) Percentage of agglutination is  
622 shown on the Y axis for different humAb concentrations indicated on the X axis. Graph  
623 represents data from 2 independent experiments (n = 2 per condition). C) Light microscopy  
624 images of humAbs (20 µg/ml) with ST3 A66. Images at 100x magnification are representative of  
625 3 independent experiments (n = 2). Scale bars, 5 µm. By one-way ANOVA: At 5 µg/ml; (C38 vs  
626 IgG1 \*\*\*P<0.001), at 10 µg/ml; (C34 & C38 vs IgG1 \*P<0.05 ); at 20 µg/ml (C10, C12, C18,  
627 C34 & C38 vs IgG1 \*\*P<0.01), at 40 µg/ml (C10, C12, C18, C27 & C38 vs IgG1 \*\*\*P<0.001).

628

629 **Figure 4: HumAb F(ab')<sub>2</sub> fragment agglutination of ST3 A66.**

630 The ability of whole IgG or F(ab')<sub>2</sub> fragments of humAbs (C10, C27, C38) to agglutinate ST3  
631 (A66) was assessed by flow cytometry. A) Representative FACS dot plots showing the  
632 percentage agglutination of the indicated whole humAbs, F(ab')<sub>2</sub> fragments, or control IgG1 at  
633 various concentrations. B) Bar graph depicting percentage agglutination on the Y axis for whole  
634 humAb or F(ab')<sub>2</sub> fragment concentrations on the X axis. Results are representative of 2  
635 independent experiments (n = 2 per condition). By one-way ANOVA: At 10 µg/ml; (C38 IgG,  
636 C38 F(ab')<sub>2</sub> vs their respective IgG1 controls \**P*<0.05); at 20 µg/ml; (C10 IgG, C10 F(ab')<sub>2</sub>, C38  
637 IgG, C38 F(ab')<sub>2</sub> vs their respective IgG1 controls \*\*\**P*<0.001); at 40 µg/ml; (C10 IgG, C10  
638 F(ab')<sub>2</sub>, C38 IgG, C38 F(ab')<sub>2</sub> vs their respective IgG1 controls \*\*\**P*<0.001).

639

640 **Figure 5: HumAb opsonophagocytic killing of ST3.**

641 HumAbs were tested for their opsonophagocytic killing activity with ST3 (A66) and HL60 cells.  
642 Percent killing is shown on the Y axis for the different humAb concentrations shown on the X  
643 axis. Results are representative of 2 independent experiments (n = 4 per condition). \**P*<0.05,  
644 \*\**P*<0.01, \*\*\**P*<0.001 (One-way ANOVA) for humAbs vs IgG1 control.

645

646 **Figure 6: HumAb efficacy against ST3 colonization in C57Bl/6 mice.**

647 HumAbs or a control IgG1 were administered IN in C57Bl/6 mice 2 hrs before IN infection with  
648 A) 5 x 10<sup>5</sup> CFU A66 or B) 1 x 10<sup>7</sup> CFU B2. The nasal lavage CFU was enumerated 24 hours (A)  
649 or 4 days (B) post infection. CFU are depicted on the Y axis for humAbs shown on the X axis C)  
650 Indicated cytokine concentrations via legendplex 4 days after infection of C57Bl/6 mice with 1 x  
651 10<sup>7</sup> CFU B2 (B) are shown on the Y axis for the humAbs on the X axis. Results are

652 representative of 2 independent experiments ( $n \geq 5$  mice/group).  $*P < 0.05$ ,  $**P < 0.01$ ,  
653  $***P < 0.001$  (One-way ANOVA).

654

655 **Figure 7: HumAb efficacy against lethal challenge with ST3 strains in C57Bl/6 mice.**

656 A) HumAbs or a control IgG1 were administered IP in C57Bl/6 mice 2 hrs before IP infection  
657 with  $5 \times 10^5$  CFU A66 and then monitored for survival. B) HumAbs or a control IgG1 were  
658 administered IN in C57Bl/6 mice 2 hrs before IN infection with  $5 \times 10^7$  CFU B2 and monitored  
659 for survival. All curves show percent survival on the Y axis for the indicated humAbs monitored  
660 over 14 days shown on the X axis. Results are representative of 2 independent experiments ( $n \geq$   
661  $7$  mice/group).  $*P < 0.05$ ,  $**P < 0.01$ ,  $***P < 0.001$ , (Fisher's exact test).

662

663 **Figure 8: HumAbs mediate changes in expression of bacterial genes related to oxidative**  
664 ***stress in vitro.***

665 The fold change in expression of the indicated genes in C10 or C27-treated bacteria relative to  
666 the control IgG1-treated bacteria was determined by RT-qPCR at 1.5 hours post-humAb  
667 addition. Relative expression of genes was determined using the Pfaffl method (55) (fold change  
668 is relative to the IgG1 control treated bacteria, expression =1). Data are pooled from 3  
669 independent experiments, 3 samples per condition.  $*P < 0.05$ ,  $**P < 0.01$ ,  $***P < 0.001$ , (One-way  
670 ANOVA) C10 or C27 vs IgG1.

671

672 **Figure 9: HumAb binding and agglutination of humAbs with light chain swaps.**

673 A) HumAbs (native) with their LC swaps were generated and tested by ELISA for binding  
674 reactivity to purified PPS3 and B2. Absorbance at 405 is shown on the Y axis for the humAb

675 concentrations shown on the X axis for each humAb. The numerical half-maximal binding titer  
676 ( $EC_{50}$ ) is depicted on the graph. Results are representative of 3 independent experiments ( $n = 2$ ).  
677 ST3 strain B2 was incubated with increasing concentrations of humAbs (C10, C10 LC swap  
678 ( $C10_H C27_L$ ), C27, C27 LC swap ( $C27_H C10_L$ )) or control IgG1 and analyzed by flow cytometry.  
679 B) Representative FACS dot plots showing percentage agglutination of the indicated native  
680 humAb or LC swap at various concentrations. C) Line graph depicting percentage agglutination  
681 on the Y axis for concentrations of indicated humAbs and LC swaps on the X axis. Results are  
682 representative of 2 independent experiments ( $n = 2$  per condition). By one-way ANOVA; at  
683 10ug/ml; (C10 vs IgG1, C10 vs C10 LC swap ( $C10_H C27_L$ ), C10 vs C27, C10 vs C27 LC swap  
684 ( $C27_H C10_L$ ) \*\*\* $P < 0.001$ ); at 20ug/ml (C10 vs IgG1, C10 vs C10 LC swap ( $C10_H C27_L$ ), C10 vs  
685 C27, C10 vs C27 LC swap ( $C27_H C10_L$ ) \* $P < 0.05$ ).

686

687

688

689

**TABLES:**

**Table 1.** Heavy and light chain VDJ gene usage and CDR3 sequences for all PPS3 humAbs.

| humAb | LC | HEAVY CHAIN |                                   |          |                                 | LIGHT CHAIN |                            |                       |
|-------|----|-------------|-----------------------------------|----------|---------------------------------|-------------|----------------------------|-----------------------|
|       |    | V gene      | D gene                            | J gene   | CDR3                            | V gene      | J gene                     | CDR3                  |
| C10   | λ  | IGHV3-9*01  | IGHD6-19*01                       | IGHJ6*04 | A R D I E H A V N H P R M M V V | IGLV2-14*03 | IGLJ2*01,IGLJ3*01          | S S Y T R T N T L V   |
| C27   | λ  | IGHV3-9*01  | IGHD6-19*01                       | IGHJ6*04 | A R D V A H A V N H P R I M S V | IGLV2-14*03 | IGLJ2*01,IGLJ3*01,IGLJ3*02 | T S Y T T D N T V I   |
| C12   | λ  | IGHV3-23*04 | IGHD6-19*01,IGHD7-27*01           | IGHJ4*02 | A K R P G D S T G W A F Y F E Y | IGLV4-69*01 | IGLJ3*02                   | Q T W G T G R W V     |
| C34   | λ  | IGHV3-72*01 | IGHD2-8*02,IGHD3-9*01,IGHD6-13*01 | IGHJ5*02 | A R A T A W S F D P             | IGLV2-14*01 | IGLJ1*01                   | S S Y T S T Y I Y V   |
| C38   | λ  | IGHV1-18*01 | IGHD6-13*01                       | IGHJ4*02 | A R G G I T T T G F D Y         | IGLV1-51*02 | IGLJ3*02                   | G A W D S S L N A G V |
| C11   | κ  | IGHV3-30*03 | IGHD3-16*01,IGHD3-16*02           | IGHJ4*02 | A R G G K G L S G G D Y         | IGKV2-28*01 | IGKJ1*01                   | M Q A L Q T P W T     |
| C18   | κ  | IGHV3-7*01  | N/A                               | IGHJ4*02 | G I G R L F Y                   | IGKV2-30*01 | IGKJ2*01                   | M Q G T H W P Y T     |



**Table 2.** Summary of *in vitro* and *in vivo* functions for all PPS3 humAbs.

|                     | <i>In vitro</i>       |                      |               |     | <i>In vivo</i>            |     |                         |                        |
|---------------------|-----------------------|----------------------|---------------|-----|---------------------------|-----|-------------------------|------------------------|
|                     | Binding               |                      | Agglutination | OPA | Reduction in Colonization |     | Survival                |                        |
| HumAb               | PPS3 EC <sub>50</sub> | ST3 EC <sub>50</sub> |               |     | A66                       | B2  | IP → IP Challenge (A66) | IN → IN Challenge (B2) |
| <b>IgG1 Control</b> | ND                    | ND                   | -             | -   | N                         | N   | 8%                      | 14%                    |
| <b>C10</b>          | 0.24                  | 0.51                 | +             | +   | Y                         | Y   | 92%                     | 85%                    |
| <b>C27</b>          | 2.03                  | 11.0                 | -             | -   | Y                         | Y   | 76%                     | 29%                    |
| <b>C38</b>          | 0.09                  | 0.05                 | +             | +   | N/A                       | N/A | 70%                     | N/A                    |
|                     |                       |                      |               |     |                           |     |                         |                        |
| <b>C11</b>          | 19.30                 | 19.20                | -             | -   | N/A                       | N/A | N/A                     | N/A                    |
| <b>C12</b>          | 0.55                  | 3.23                 | +             | +   | N/A                       | N/A | N/A                     | N/A                    |
| <b>C18</b>          | 1.13                  | 2.84                 | -             | +   | N/A                       | N/A | N/A                     | N/A                    |
| <b>C34</b>          | 0.21                  | 3.01                 | +             | +   | N/A                       | N/A | N/A                     | N/A                    |

ND = not detected, N/A = not applicable, Y= Yes, N = No, (+) = strong activity, (-) = weak/no activity, IP → IP challenge = Refer to figure 7A, IN → IN challenge = Refer to figure 7B.

**FIGURES:**

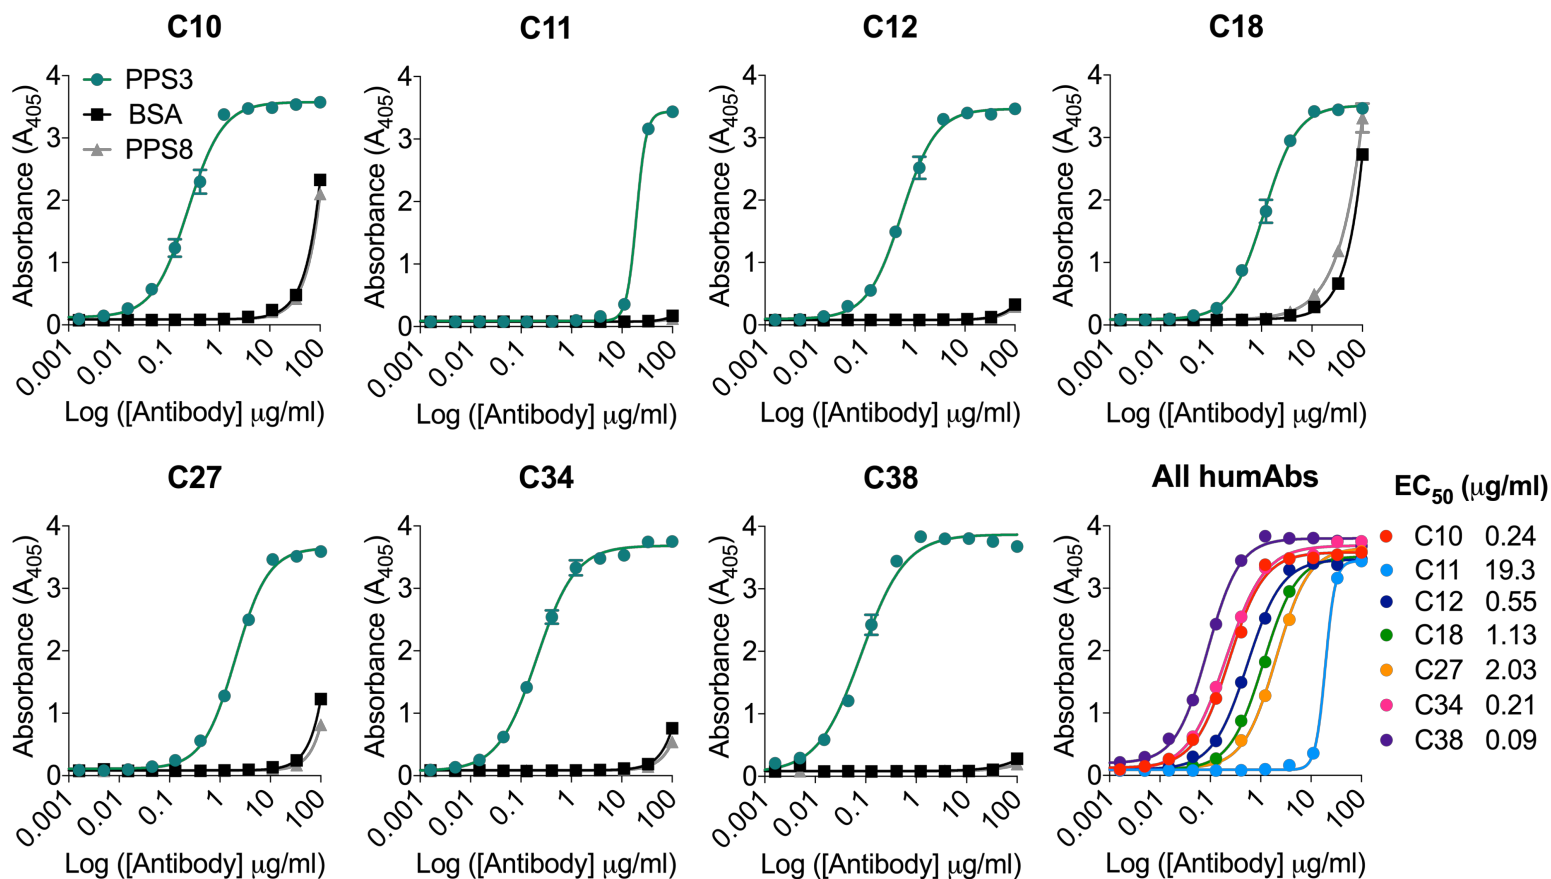

**Figure 1: HumAb binding to pneumococcal polysaccharide 3 (PPS3) by ELISA.** Binding as reflected by absorbance at 405 is shown on the Y axis for the humAb concentrations shown on the X axis for each humAb. Results are representative of 3 independent experiments (n = 2). The numerical half-maximal binding titer ( $EC_{50}$ ) for each humAb is indicated to the right of the panel depicting binding curves of all humAbs.

**A****V<sub>H</sub> Regions**

|                             | FR1-IMGT<br>(1-26) |        | CDR1-IMGT<br>(27-38) |        | FR2-IMGT<br>(39-55) |         | CDR2-IMGT<br>(56-65) |        | FR3-IMGT<br>(66-104) |        |        |         |        |         |       |       |          |       |
|-----------------------------|--------------------|--------|----------------------|--------|---------------------|---------|----------------------|--------|----------------------|--------|--------|---------|--------|---------|-------|-------|----------|-------|
|                             | 1                  | 10     | 20                   | 30     | 40                  | 50      | 60                   | 70     | 80                   | 90     | 100    |         |        |         |       |       |          |       |
| <b>GERMLINE:</b> IGHV3-9*01 | EVQLVESGG          | GLVQ   | PGRSLR               | LSCAAS | GFTF                | DDYA    | MHWVRQ               | APGK   | GLEWVSG              | ISWN   | SGSI   | GYADSVK | GRFTIS | RDNAKNS | LYLQ  | MNSL  | RAEDTAL  | YYC   |
| C10 V <sub>H</sub>          | -----              | -----  | T-----               | -----  | -----               | -----   | -----                | V----- | D-----               | M--K   | ..--I- | N-----  | -----  | -----   | ----- | ----- | V---V--- |       |
| C27 V <sub>H</sub>          | -----              | A----- | -----                | V----- | ---V                | ...E--- | -----                | -----  | S--K                 | ..--M- | R----- | -----   | -----  | -----   | ----- | ----- | -----    | ----- |

**B****V<sub>L</sub> Regions**

|                              | FR1-IMGT<br>(1-26) |        | CDR1-IMGT<br>(27-38) |        | FR2-IMGT<br>(39-55) |        | CDR2-IMGT<br>(56-65) |        | FR3-IMGT<br>(66-104) |        |         |        |           |          |         |       |      |
|------------------------------|--------------------|--------|----------------------|--------|---------------------|--------|----------------------|--------|----------------------|--------|---------|--------|-----------|----------|---------|-------|------|
|                              | 1                  | 10     | 20                   | 30     | 40                  | 50     | 60                   | 70     | 80                   | 90     | 100     |        |           |          |         |       |      |
| <b>GERMLINE:</b> IGLV2-14*03 | QSALTQPAS          | VSGSPG | QSITISCTGT           | SSDVG  | ..GYNY              | VSWYQQ | HPGKAP               | KLMIY  | DV                   | .....S | NRPSGVS | NRFGSK | ..SGNTASL | TISGLQAE | DEADYYC |       |      |
| C10 V <sub>L</sub>           | --V-----           | -----  | -----                | N----- | -----               | -----  | V-----               | F----- | -----                | .....T | -----   | -----  | -----     | -----    | -----   |       |      |
| C27 V <sub>L</sub>           | --V-----           | -----  | -----                | -R---  | ...T---             | -----  | TV---                | L-F--- | -----                | .....T | -----   | D----- | -----     | D-----   | -----   | ----- | E--- |

**Figure 2: C10 and C27 variable heavy (V<sub>H</sub>) and light (V<sub>L</sub>) chain amino acid sequences.**

HumAb A) V<sub>H</sub> and B) V<sub>L</sub> sequences aligned with their germline counterparts based on IMGT/V-QUEST (sequence alignment software). Amino acid changes resulting from somatic mutations are indicated within the sequence alignment.

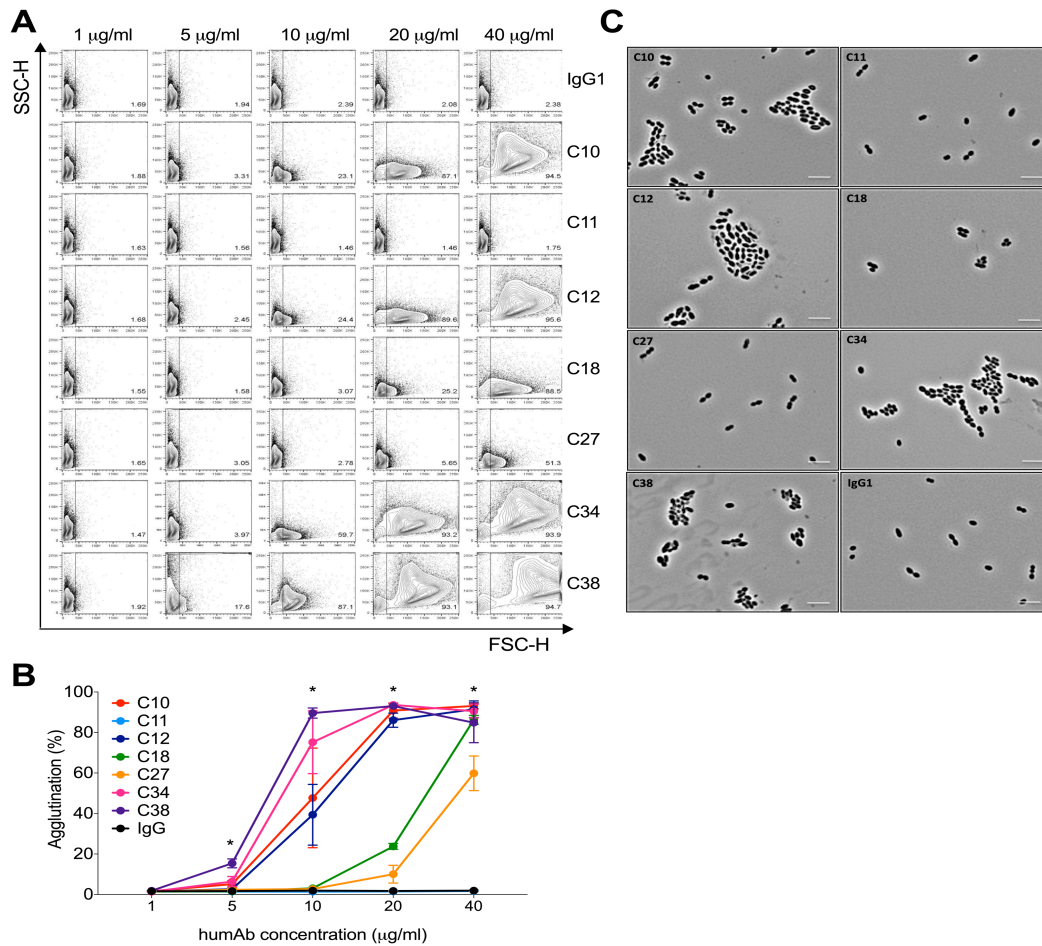

**Figure 3: HumAb agglutination of ST3 A66.**

The ability of the humAbs to agglutinate ST3 (A66) was assessed by flow cytometry. A) Representative FACS dot plots showing the percentage agglutination of all humAbs and control human IgG1 at various concentrations by flow cytometry B) Percentage of agglutination is shown on the Y axis for different humAb concentrations indicated on the X axis. Graph represents data from 2 independent experiments (n = 2 per condition). C) Light microscopy images of humAbs (20 µg/ml) with ST3 A66. Images at 100x magnification are representative of 3 independent experiments (n = 2). Scale bars, 5 µm. By one-way ANOVA: At 5 µg/ml; (C38 vs IgG1 \*\*\* $P < 0.001$ ), at 10 µg/ml; (C34 & C38 vs IgG1 \* $P < 0.05$ ); at 20 µg/ml (C10, C12, C18, C34 & C38 vs IgG1 \*\* $P < 0.01$ ), at 40 µg/ml (C10, C12, C18, C27 & C38 vs IgG1 \*\*\* $P < 0.001$ ).

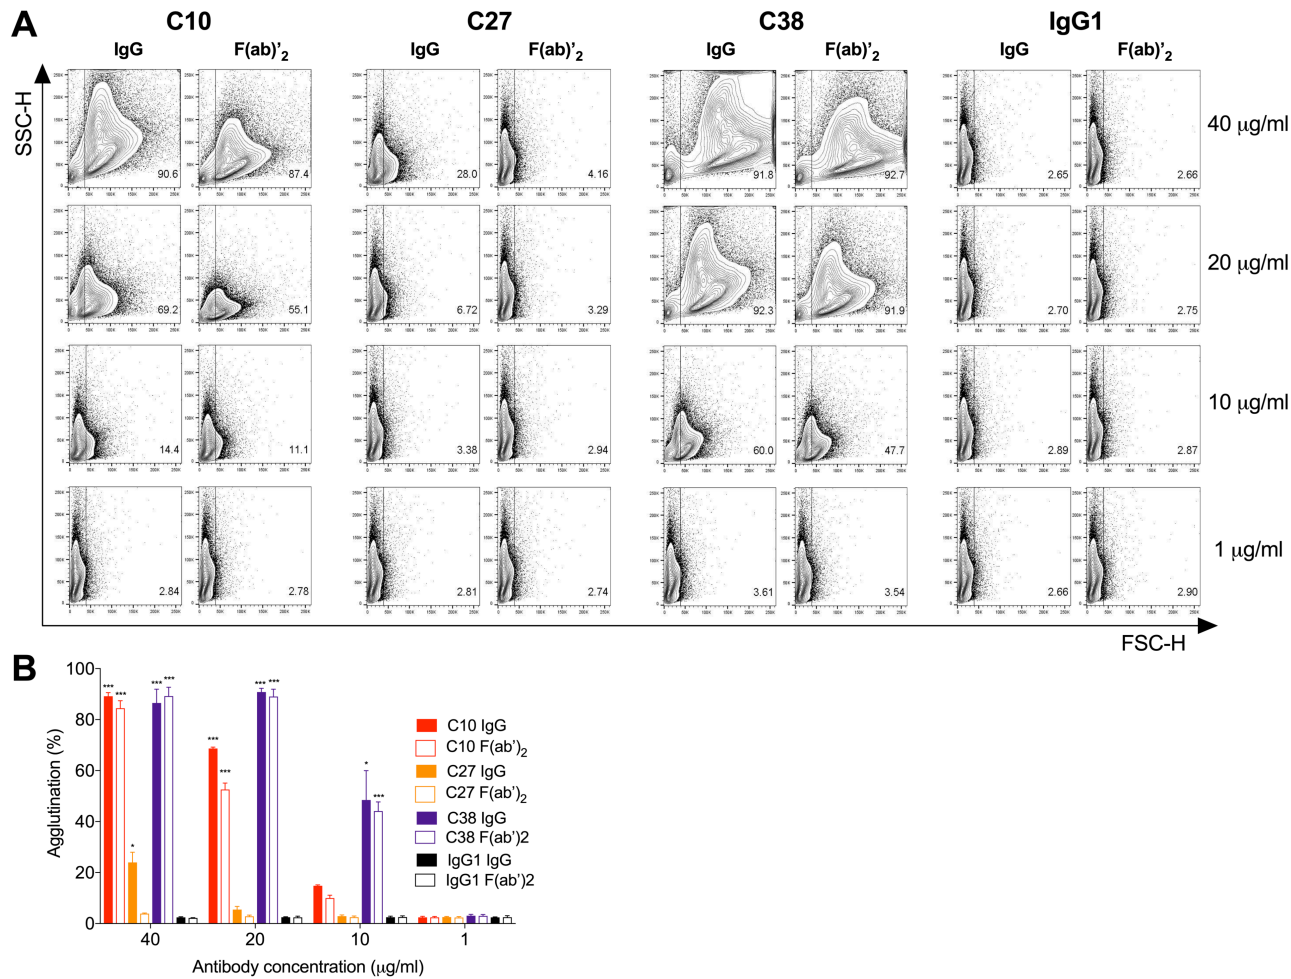

**Figure 4: HumAb F(ab')<sub>2</sub> fragment agglutination of ST3 A66.**

The ability of whole IgG or F(ab')<sub>2</sub> fragments of humAbs (C10, C27, C38) to agglutinate ST3 (A66) was assessed by flow cytometry. A) Representative FACS dot plots showing the percentage agglutination of the indicated whole humAbs, F(ab')<sub>2</sub> fragments, or control IgG1 at various concentrations. B) Bar graph depicting percentage agglutination on the Y axis for whole humAb or F(ab')<sub>2</sub> fragment concentrations on the X axis. Results are representative of 2 independent experiments (n = 2 per condition). By one-way ANOVA: At 10 µg/ml; (C38 IgG, C38 F(ab')<sub>2</sub>) vs their respective IgG1 controls \**P*<0.05); at 20 µg/ml; (C10 IgG, C10 F(ab')<sub>2</sub>, C38 IgG, C38 F(ab')<sub>2</sub>) vs their respective IgG1 controls \*\*\**P*<0.001); at 40 µg/ml; (C10 IgG, C10 F(ab')<sub>2</sub>, C38 IgG, C38 F(ab')<sub>2</sub>) vs their respective IgG1 controls \*\*\**P*<0.001).

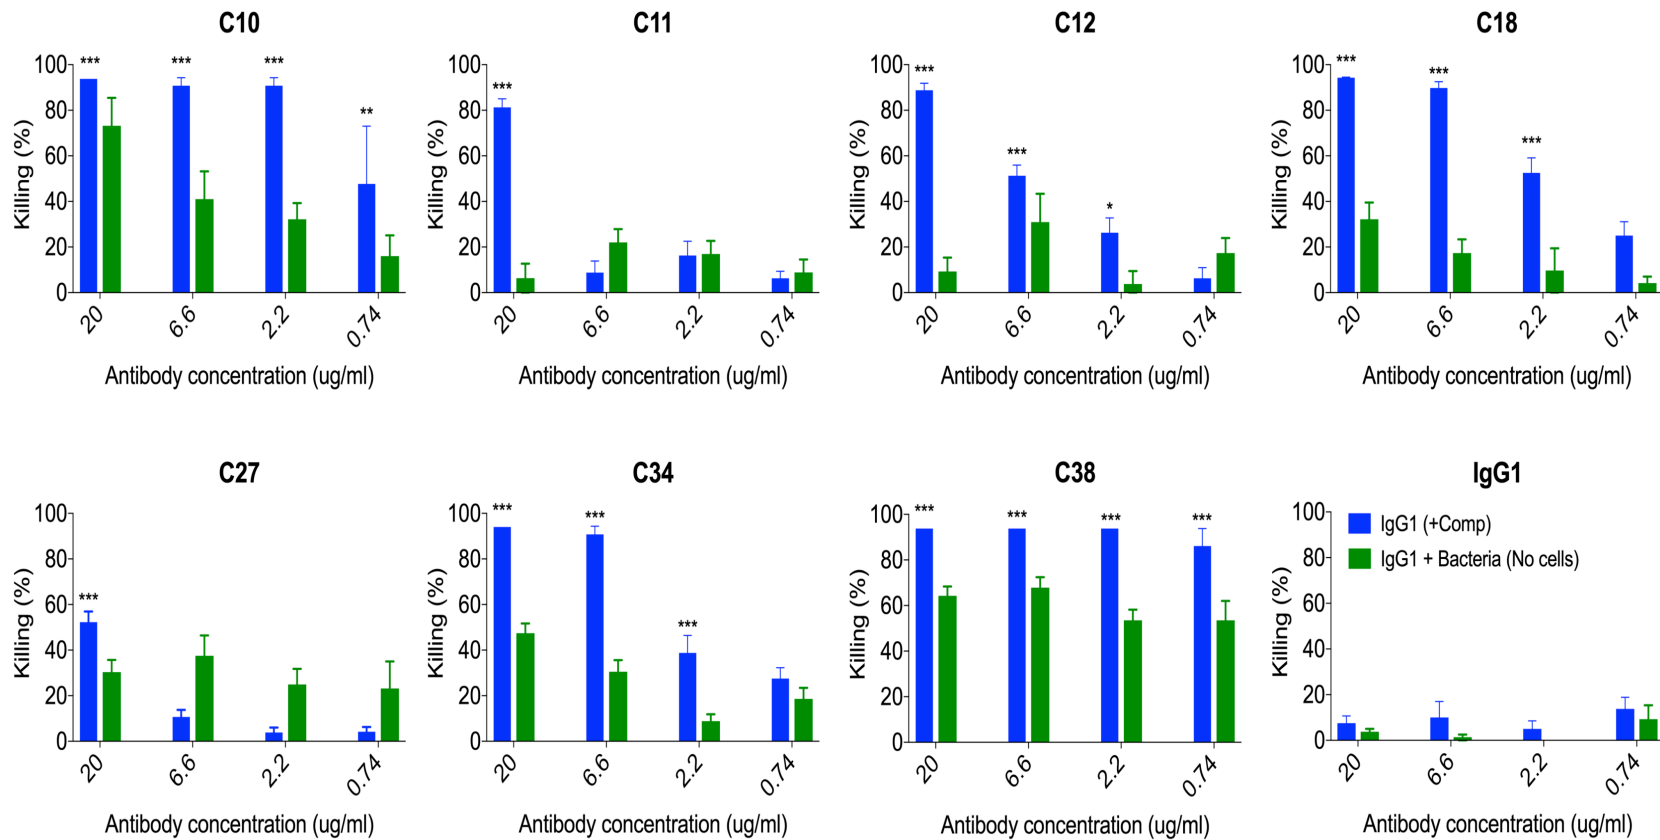

**Figure 5: HumAb opsonophagocytic killing of ST3.**

HumAbs were tested for their opsonophagocytic killing activity with ST3 (A66) and HL60 cells. Percent killing is shown on the Y axis for the different humAb concentrations shown on the X axis. Results are representative of 2 independent experiments (n = 4 per condition). \*P<0.05, \*\*P<0.01, \*\*\*P<0.001 (One-way ANOVA) for humAbs vs IgG1 control.

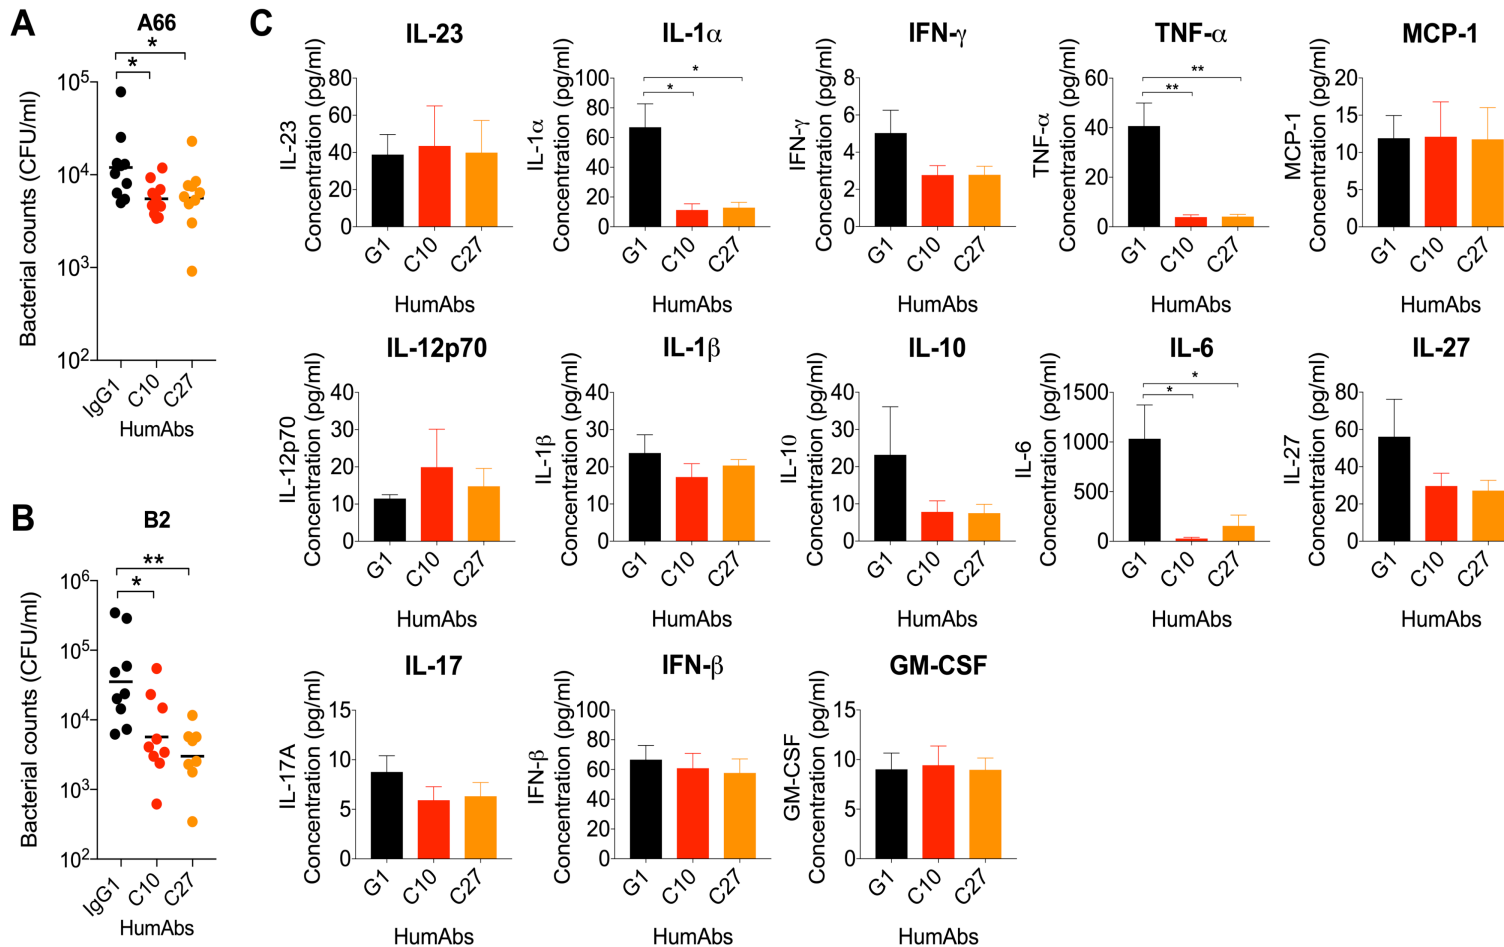

**Figure 6: HumAb efficacy against ST3 colonization in C57Bl/6 mice.**

HumAbs or a control IgG1 were administered IN in C57Bl/6 mice 2 hrs before IN infection with A)  $5 \times 10^5$  CFU A66 or B)  $1 \times 10^7$  CFU B2. The nasal lavage CFU was enumerated 24 hours (A) or 4 days (B) post infection. CFU are depicted on the Y axis for humAbs shown on the X axis C) Indicated cytokine concentrations via legendplex 4 days after infection of C57Bl/6 mice with  $1 \times 10^7$  CFU B2 (B) are shown on the Y axis for the humAbs on the X axis. Results are representative of 2 independent experiments ( $n \geq 5$  mice/group). \* $P < 0.05$ , \*\* $P < 0.01$ , \*\*\* $P < 0.001$  (One-way ANOVA).

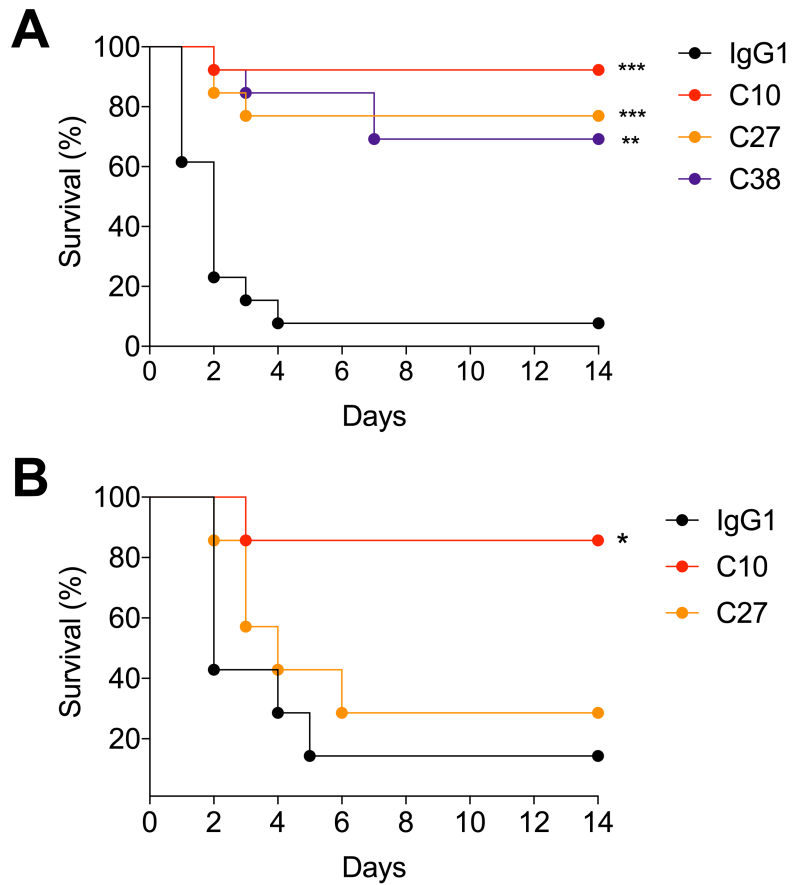

**Figure 7: HumAb efficacy against lethal challenge with ST3 strains in C57Bl/6 mice.**

A) HumAbs or a control IgG1 were administered IP in C57Bl/6 mice 2 hrs before IP infection with  $5 \times 10^5$  CFU A66 and then monitored for survival. B) HumAbs or a control IgG1 were administered IN in C57Bl/6 mice 2 hrs before IN infection with  $5 \times 10^7$  CFU B2 and monitored for survival. All curves show percent survival on the Y axis for the indicated humAbs monitored over 14 days shown on the X axis. Results are representative of 2 independent experiments ( $n \geq 7$  mice/group). \* $P < 0.05$ , \*\* $P < 0.01$ , \*\*\* $P < 0.001$ , (Fisher's exact test).



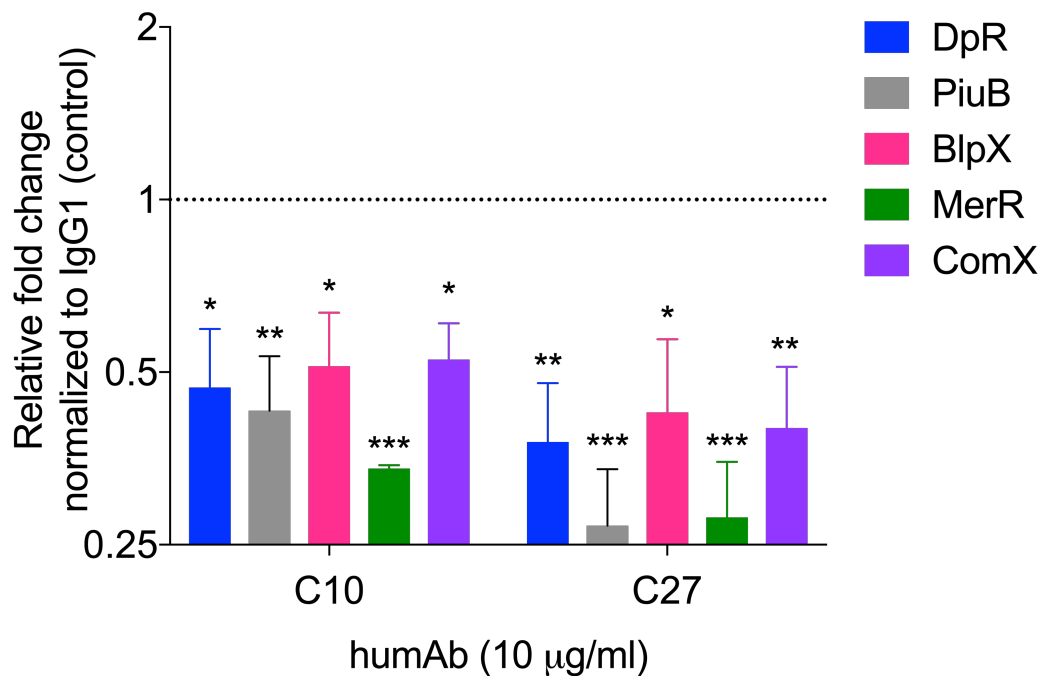

**Figure 8: HumAbs mediate changes in expression of bacterial genes related to oxidative stress *in vitro*.**

The fold change in expression of the indicated genes in C10 or C27-treated bacteria relative to the control IgG1-treated bacteria was determined by RT-qPCR at 1.5 hours post-humAb addition. Relative expression of genes was determined using the Pfaffl method (55) (fold change is relative to the IgG1 control treated bacteria, expression =1). Data are pooled from 3 independent experiments, 3 samples per condition. \* $P < 0.05$ , \*\* $P < 0.01$ , \*\*\* $P < 0.001$ , (One-way ANOVA) C10 or C27 vs IgG1.

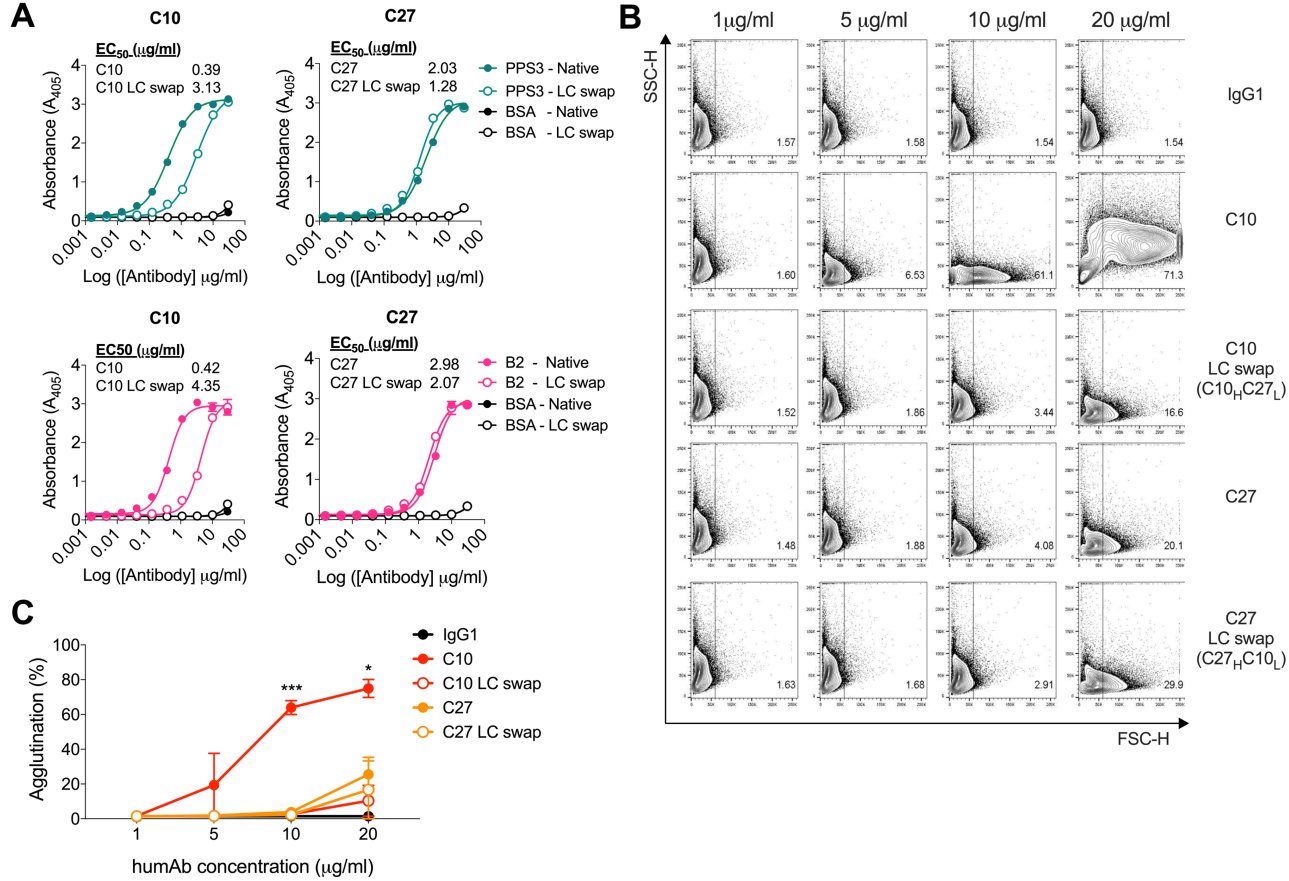

**Figure 9: HumAb binding and agglutination of humAbs with light chain swaps.**

A) HumAbs (native) with their LC swaps were generated and tested by ELISA for binding reactivity to purified PPS3 and B2. Absorbance at 405 is shown on the Y axis for the humAb concentrations shown on the X axis for each humAb. The numerical half-maximal binding titer ( $EC_{50}$ ) is depicted on the graph. Results are representative of 3 independent experiments ( $n = 2$ ). ST3 strain B2 was incubated with increasing concentrations of humAbs (C10, C10 LC swap (C10<sub>H</sub>C27<sub>L</sub>), C27, C27 LC swap (C27<sub>H</sub>C10<sub>L</sub>)) or control IgG1 and analyzed by flow cytometry. B) Representative FACS dot plots showing percentage agglutination of the indicated native humAb or LC swap at various concentrations. C) Line graph depicting percentage agglutination on the Y axis for concentrations of indicated humAbs and LC swaps on the X axis. Results are representative of 2 independent experiments ( $n = 2$  per condition). By one-way ANOVA; at 10 $\mu\text{g/ml}$ ; (C10 vs IgG1, C10 vs C10 LC swap (C10<sub>H</sub>C27<sub>L</sub>), C10 vs C27, C10 vs C27 LC swap (C27<sub>H</sub>C10<sub>L</sub>) \*\*\* $P < 0.001$ ); at 20 $\mu\text{g/ml}$  (C10 vs IgG1, C10 vs C10 LC swap (C10<sub>H</sub>C27<sub>L</sub>), C10 vs C27, C10 vs C27 LC swap (C27<sub>H</sub>C10<sub>L</sub>) \* $P < 0.05$

690 **SUPPLEMENTARY MATERIAL LEGENDS:**

691

692 **Table S1:** Primers used for RT-qPCR

693

694 **Figure S1:** HumAb binding to ST3 clinical strain B2 by ELISA.

695 Binding reflected by absorbance at 405 is shown on the Y axis for the humAb concentrations  
696 shown on the X axis for each humAb. Results are representative of 3 independent experiments (n  
697 = 2). The numerical half-maximal binding titer ( $EC_{50}$ ) for each humAb is indicated to the right of  
698 the panel depicting binding curves of all humAbs.

699

700 **Figure S2:** Binding of humAbs to the clinical strain B2 by immunofluorescence.

701 ST3 clinical strain B2 was incubated with humAbs (20  $\mu\text{g/ml}$ ) and antibody binding was  
702 detected using IgG conjugated to FITC. Fluorescent images were analysed at 100X  
703 magnification and representative of 2 independent experiments (n = 2). Non-specific IgG1 was  
704 used as a control. White bar represents 2 $\mu\text{M}$ .

705

706 **Figure S3:** Heavy chain variable region ( $V_H$ ) sequences of PPS3-specific humAbs.

707 HumAb  $V_H$  sequences aligned with their germline counterparts based on IMGT/V-QUEST  
708 (sequence alignment software). Amino acid changes resulting from somatic mutations are  
709 indicated within the sequence alignment.

710

711 **Figure S4:** Light chain variable region ( $V_L$ ) sequences of PPS3-specific humAbs.

712 HumAb V<sub>L</sub> sequences aligned with their germline counterparts based on IMGT/V-QUEST  
713 (sequence alignment software). Amino acid changes resulting from somatic mutations are  
714 indicated within the sequence alignment.

715

716 **Figure S5: *In vitro* agglutination of a clinical ST3 strain.**

717 HumAbs were tested for their ability to agglutinate a ST3 clinical strain (B2) by flow cytometry.  
718 A) Representative FACS dot plots showing the percentage agglutination of all humAbs and  
719 control human IgG1 at various concentrations by flow cytometry B) Percentage of agglutination  
720 is shown on the Y axis for different humAb concentrations indicated on the X axis. Graph  
721 represents data from 2 independent experiments (n = 2 per condition). By one way ANOVA: At  
722 5 µg/ml; (C10, C34 & C38 vs IgG1 \**P*<0.05), at 10 µg/ml; (C10, C12, C34 & C38 vs IgG1  
723 \*\*\**P*<0.001 ); at 20 µg/ml (C10, C12, C18, C34 & C38 vs IgG1 \*\**P*<0.01), at 40 µg/ml (C10,  
724 C12, C18, C27 & C38 vs IgG1 \*\**P*<0.01).

725

726 **Figure S6: PPS3-PE optimization with ST3 hybridoma cells.**

727 ST3 hybridoma cells were optimized with different concentrations of PPS3-PE with and without  
728 the presence of unlabelled PPS3 (25 µg/well). PPS3-PE positive signal was determined by flow  
729 cytometry. Histograms represent the following groups; Control (cells with no PPS3-PE) (Red),  
730 Pre-incubation (cells pre-incubated with unlabelled PPS3 prior to addition of PPS3-PE) (blue),  
731 PPS3-PE (cells incubated only with PPS3-PE) (Orange). Results are representative of 2  
732 independent experiments (n = 2).

733

734 **Figure S7: Representative gating strategy to sort for PPS3+ Memory B cells.**

735 PBMCs were collected from patients 7 days following vaccination with pneumococcal vaccines

736 and stained to sort for CD19<sup>+</sup>CD27<sup>+</sup>IgM<sup>-</sup>IgG<sup>+</sup>PPS3<sup>+</sup> cells (See Methods for details).

737

738

739
